# Supplementary material for: Landscape of genetic lesions in 944 patients with myelodysplastic syndromes
Source: PubMed Central journal article supplement — Leukemia. 2013 Nov 29;28(2):241–7. doi: 10.1038/leu.2013.336 (PMC3918868; doi:10.1038/leu.2013.336), 2013-11-29

## Supplementary Figure S1

.fastq data from HiSeq 2000 (100bp pair end read)

Align to the human genome reference (hg19) using BWA

Remove PCR duplicates by Picard MarkDuplicates

Discard low-quality reads and low-quality bases:

- Reads with 5 or more mismatches
- Reads with < 25 mapping quality
- Bases with < 30 base quality

Detect variants fulfilling the criteria:

- with 10 or more total reads
- with 6 or more supporting reads
- with supporting read(s) from both direction
- with > 0.02 allele frequency

Remove synonymous SNVs / ambiguous candidates

Remove Missense SNVs registered in known polymorphisms database:

- In-house SNP database
- dbSNP131
- 1000 genomes as of 2011/05/21
- ESP 6500

Remove candidates fulfilling the criteria:

- Missense SNVs with 0.45 ~ 0.55 allele frequency or on copy number change

Rescue candidates registered in COSMIC V60 except for novel recurrent variants ( $n \geq 2$ ) not reported somatic origins in the literature.

Remove candidates, if the same variant allele is also detected in 53 normal samples with 0.25% allele frequency on average or identical candidates in 53 normal samples

Remove mapping errors by visual inspection with IGV

Final list of variants

## Supplementary Figure S2

### Number of variants

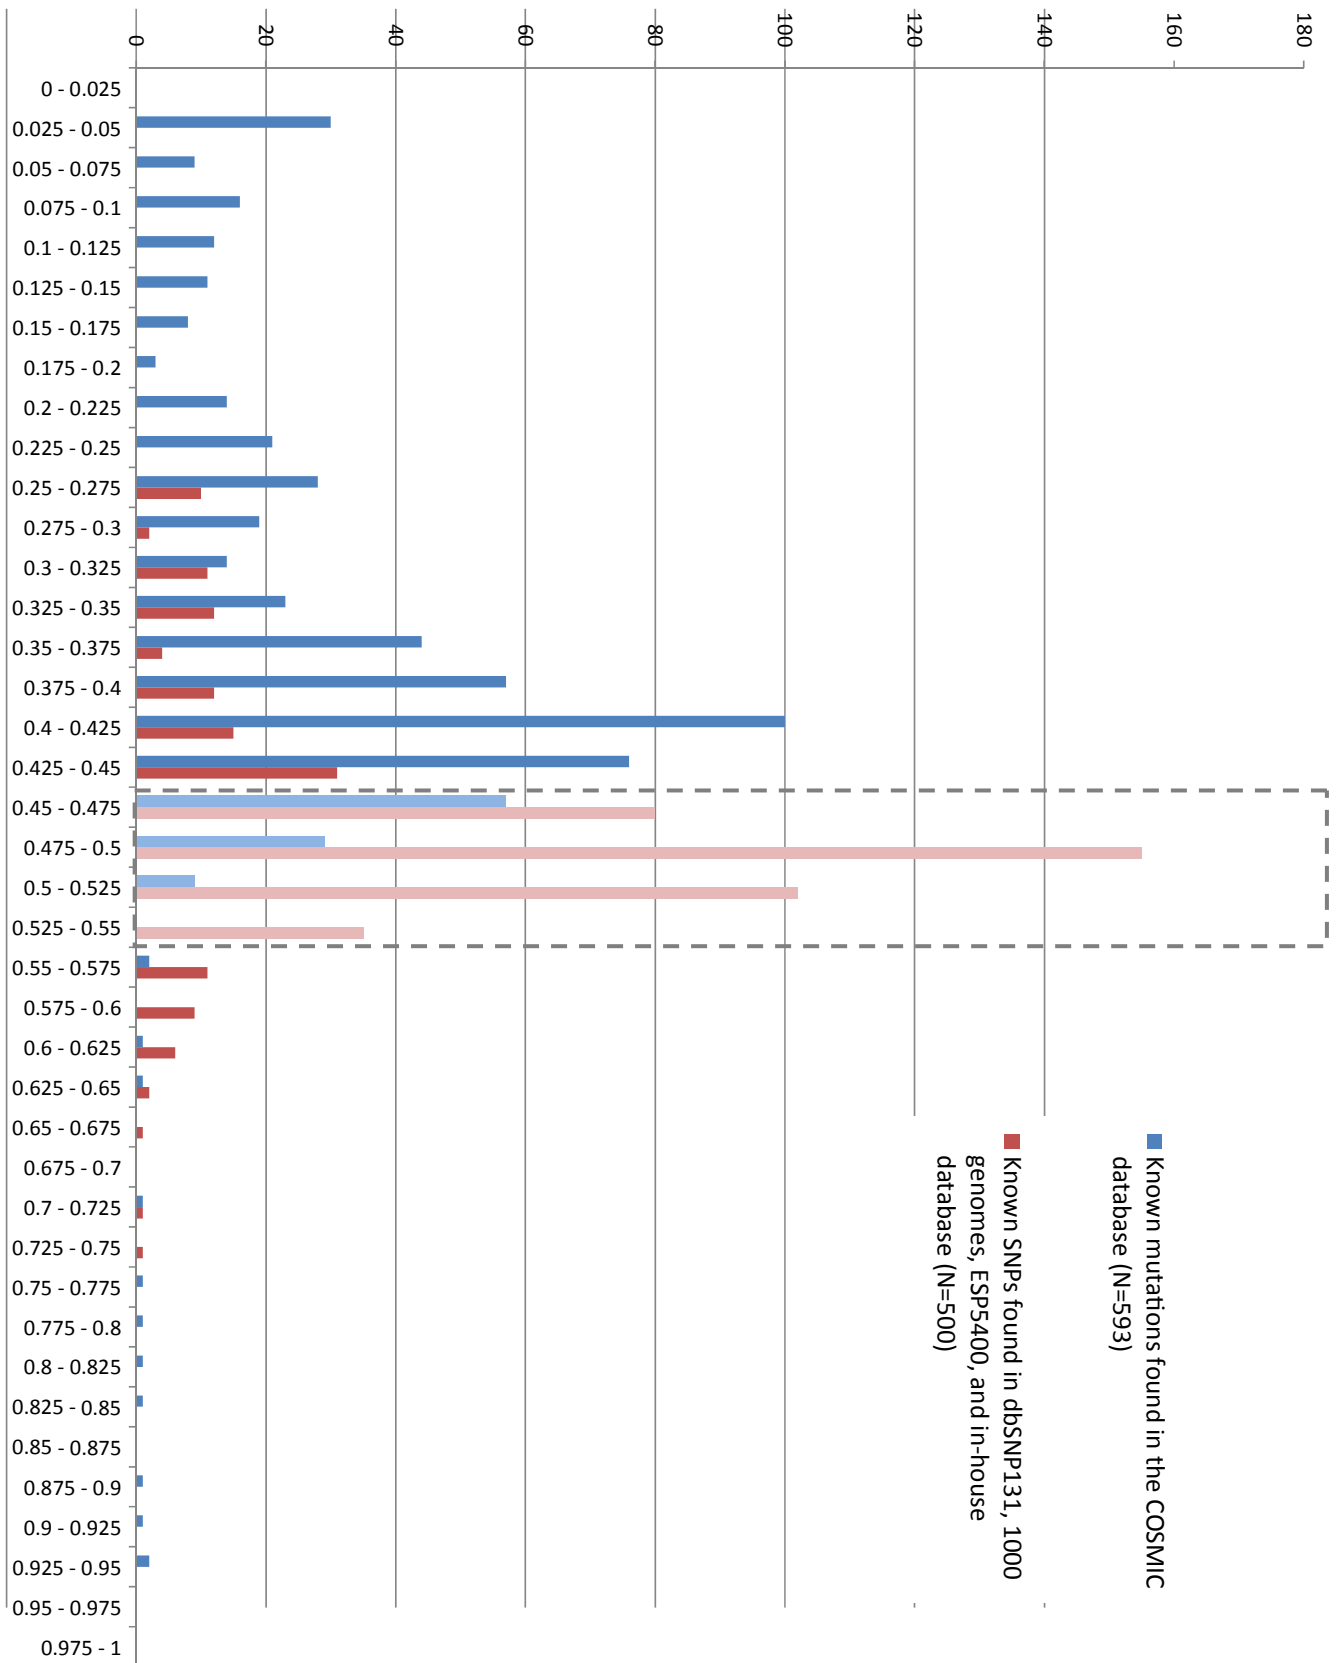

# Supplementary Figure S3

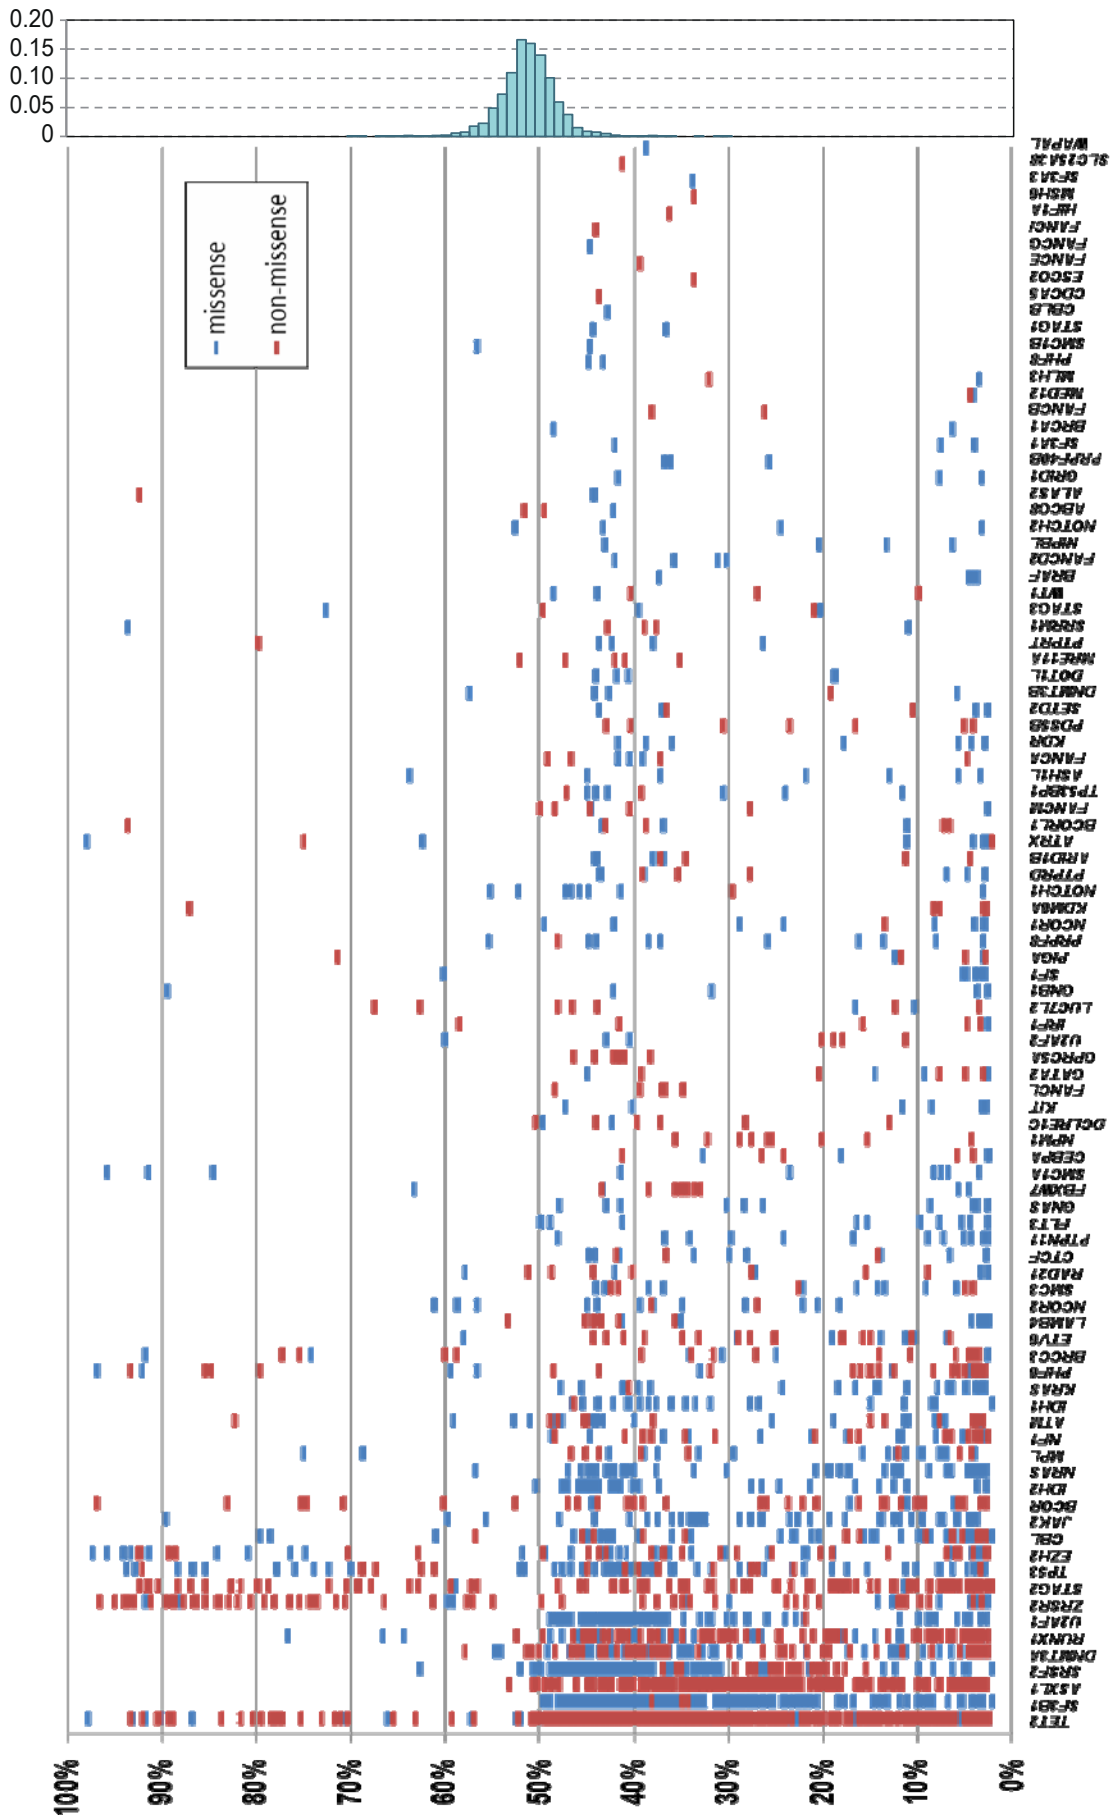

Supplementary Figure S4

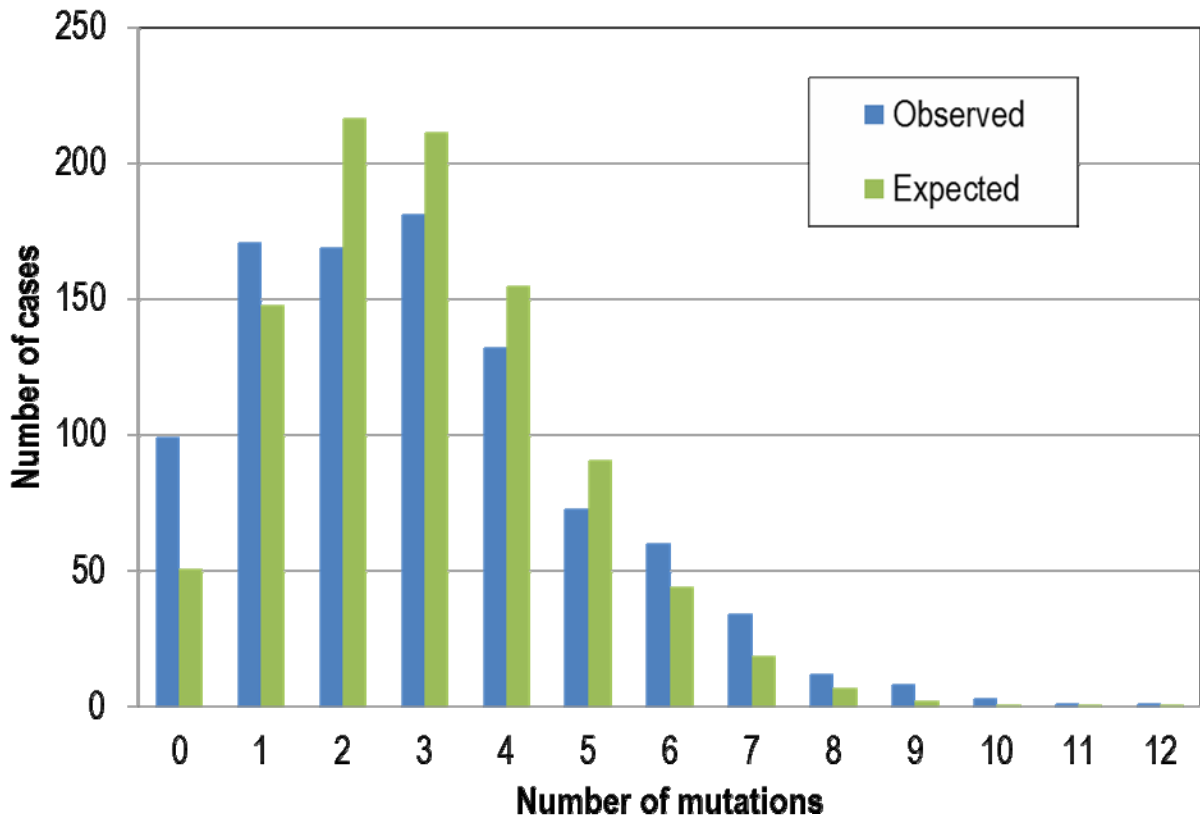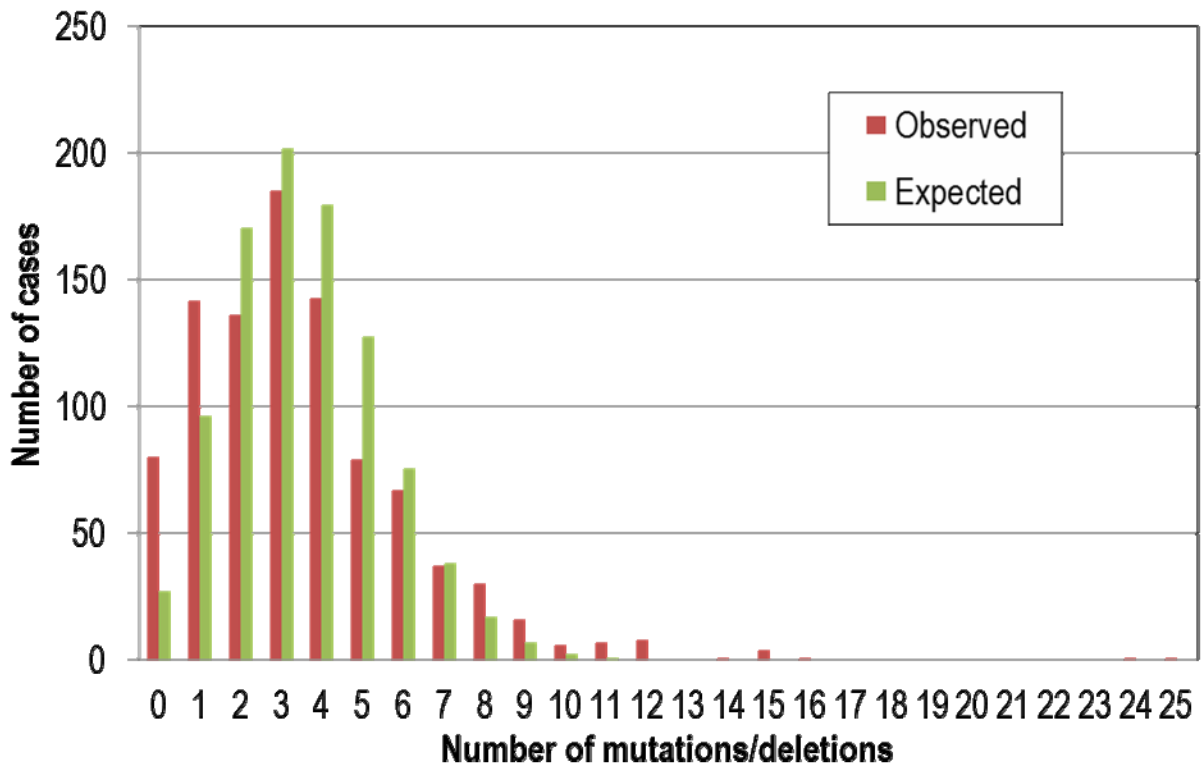

Supplementary Figure S5

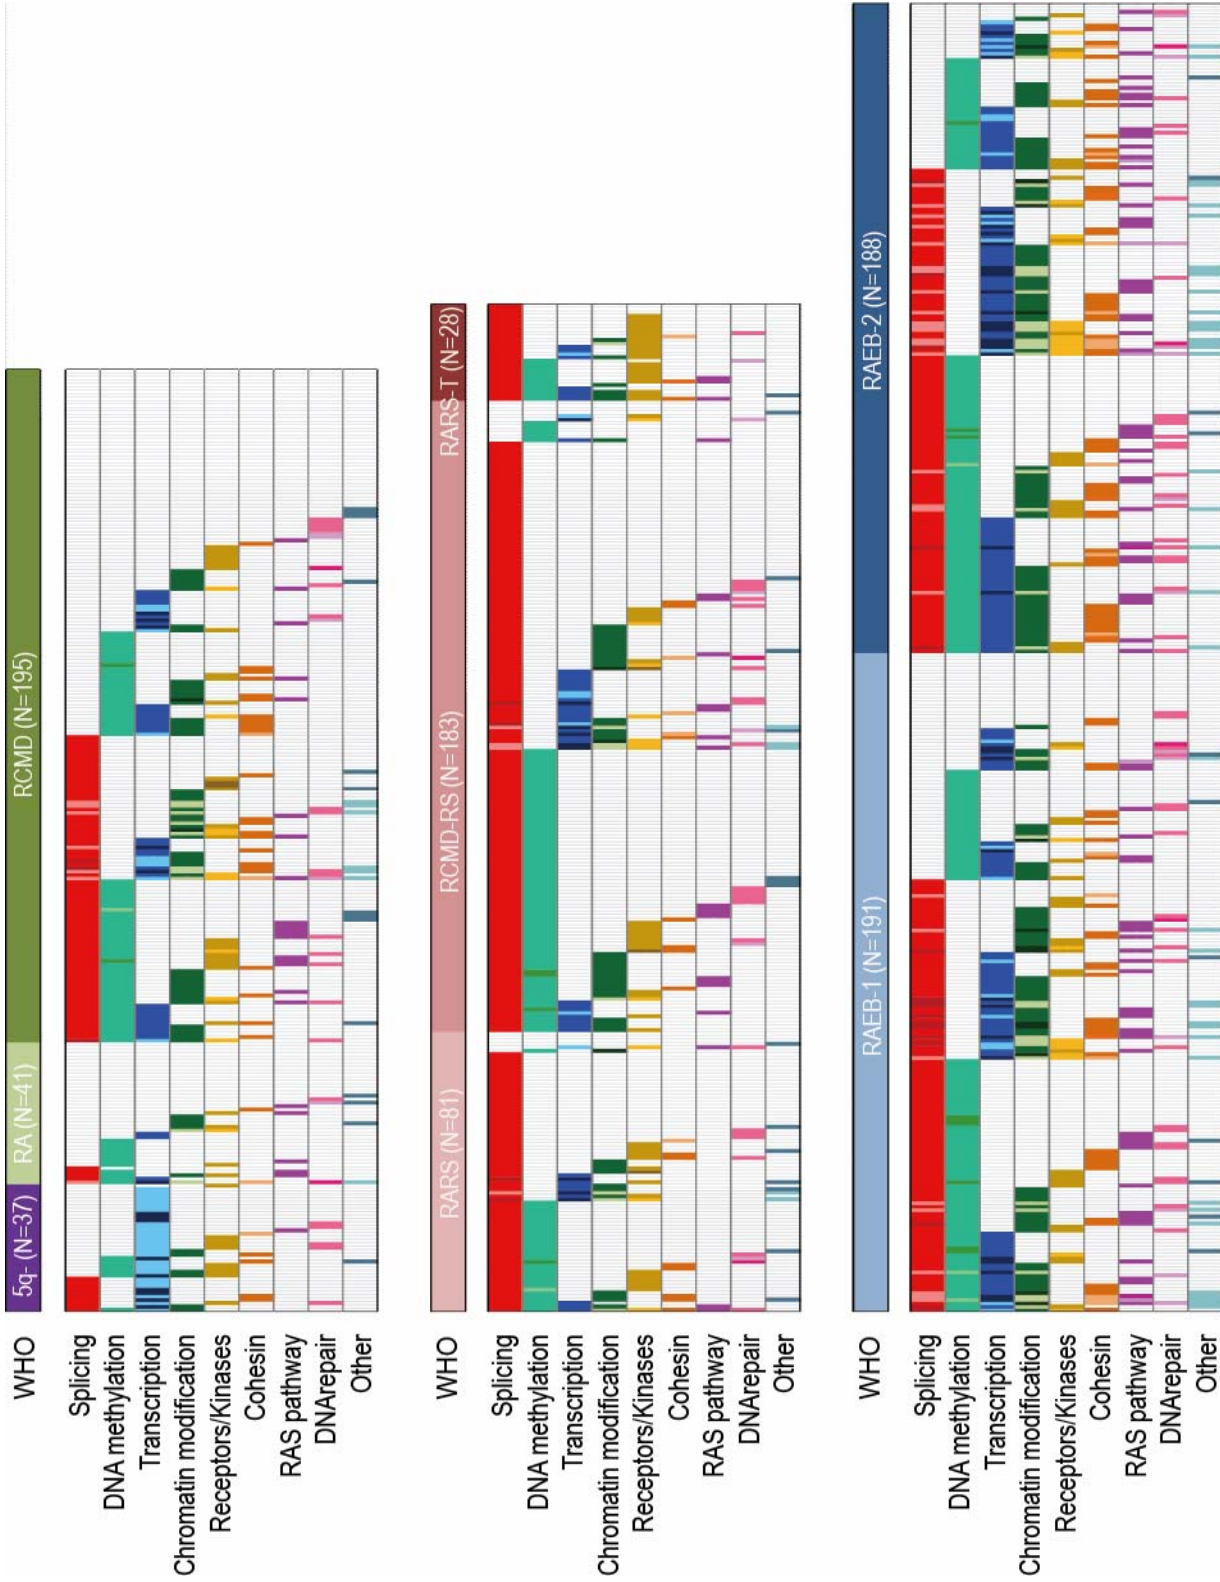

# Supplementary Figure S6

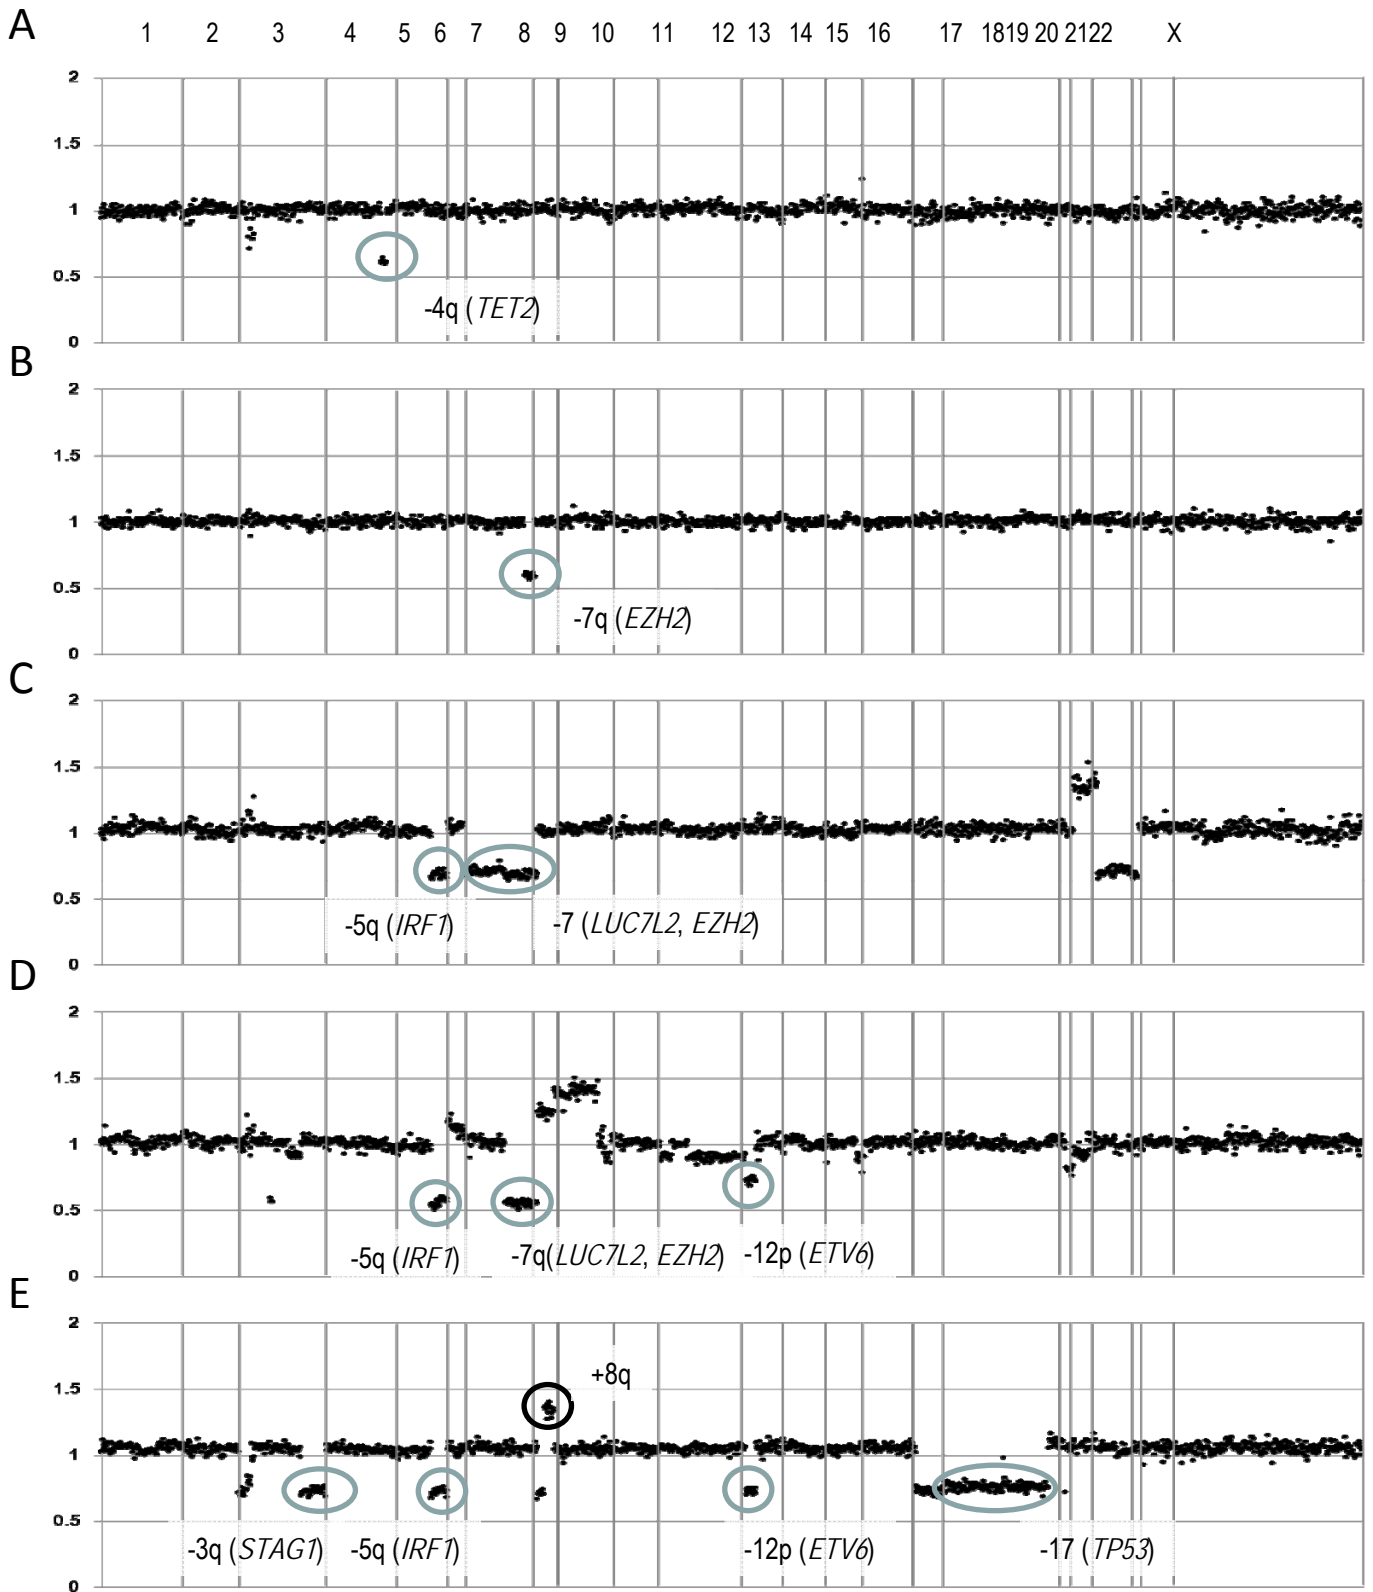

Supplementary Figure S7

**A**

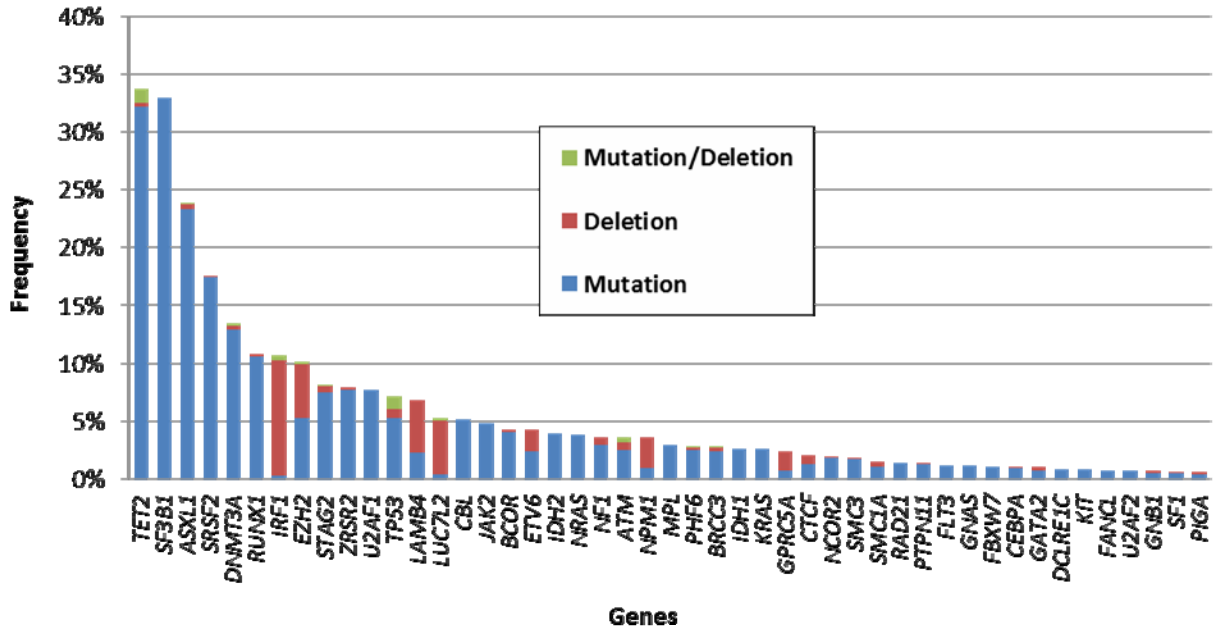

**B**

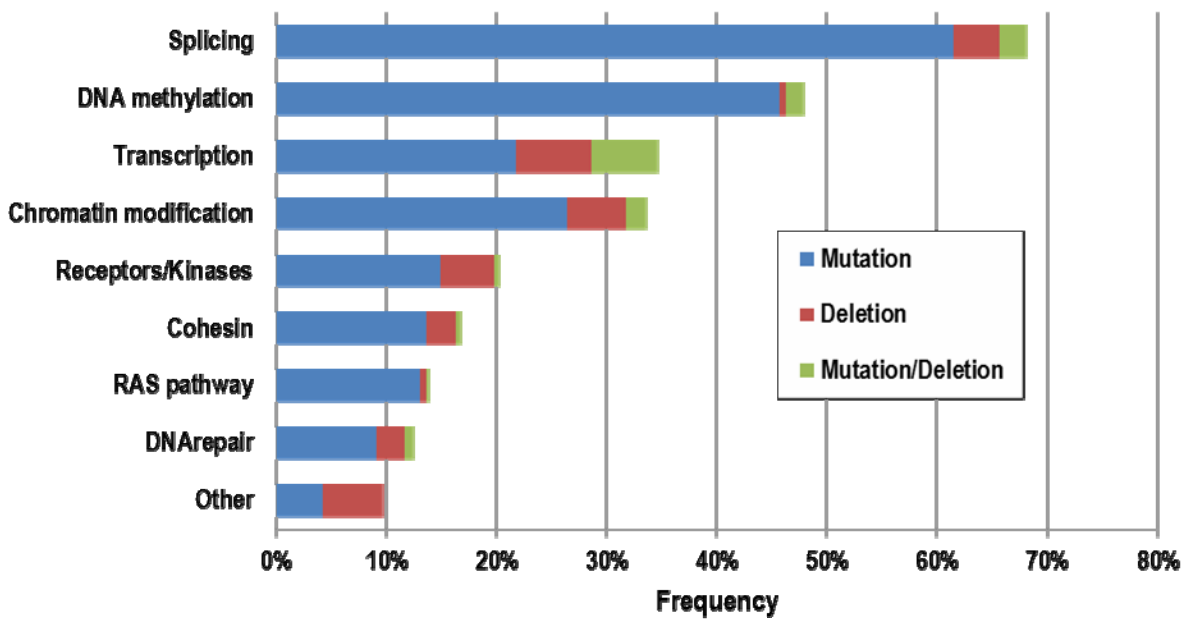

# Supplementary Figure S8A-B

A

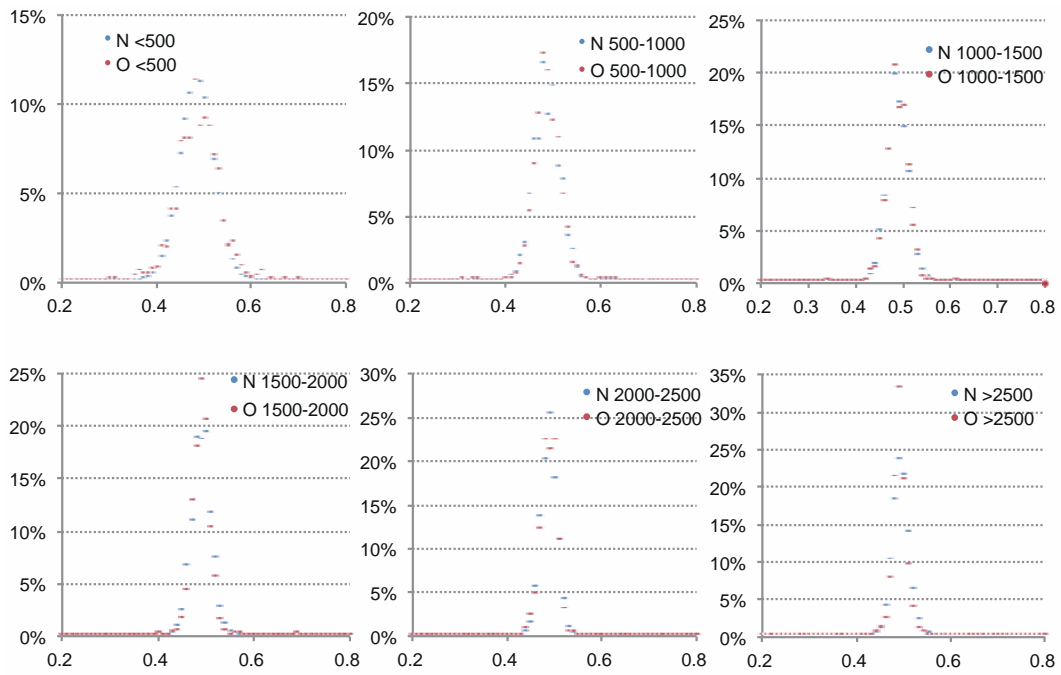

B

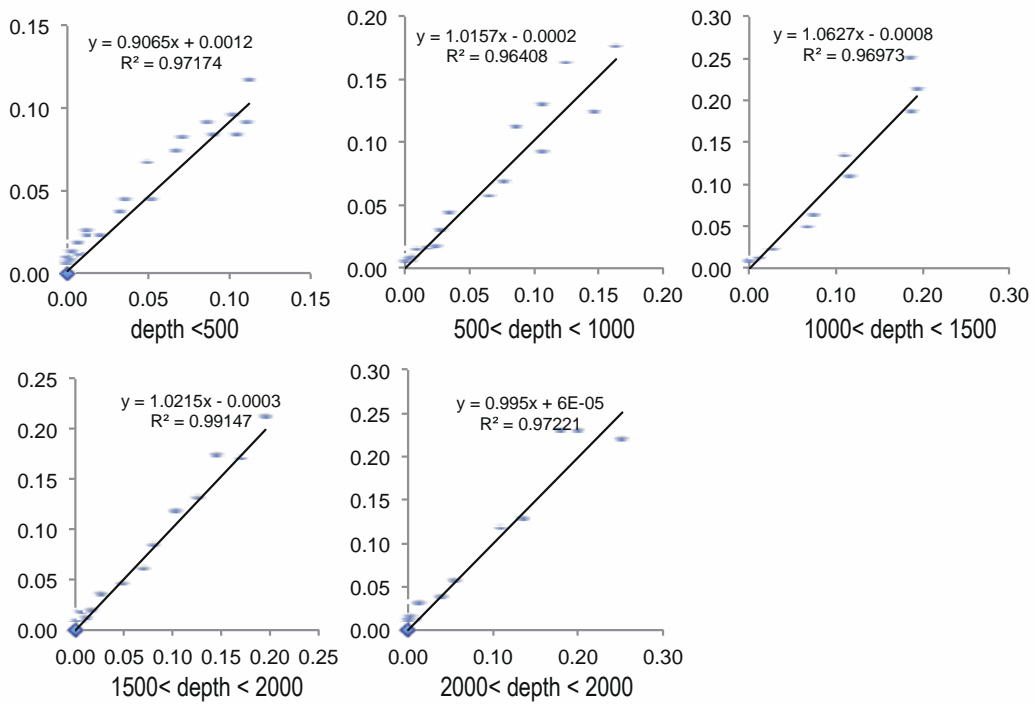



Supplementary Figure S8C-D

C

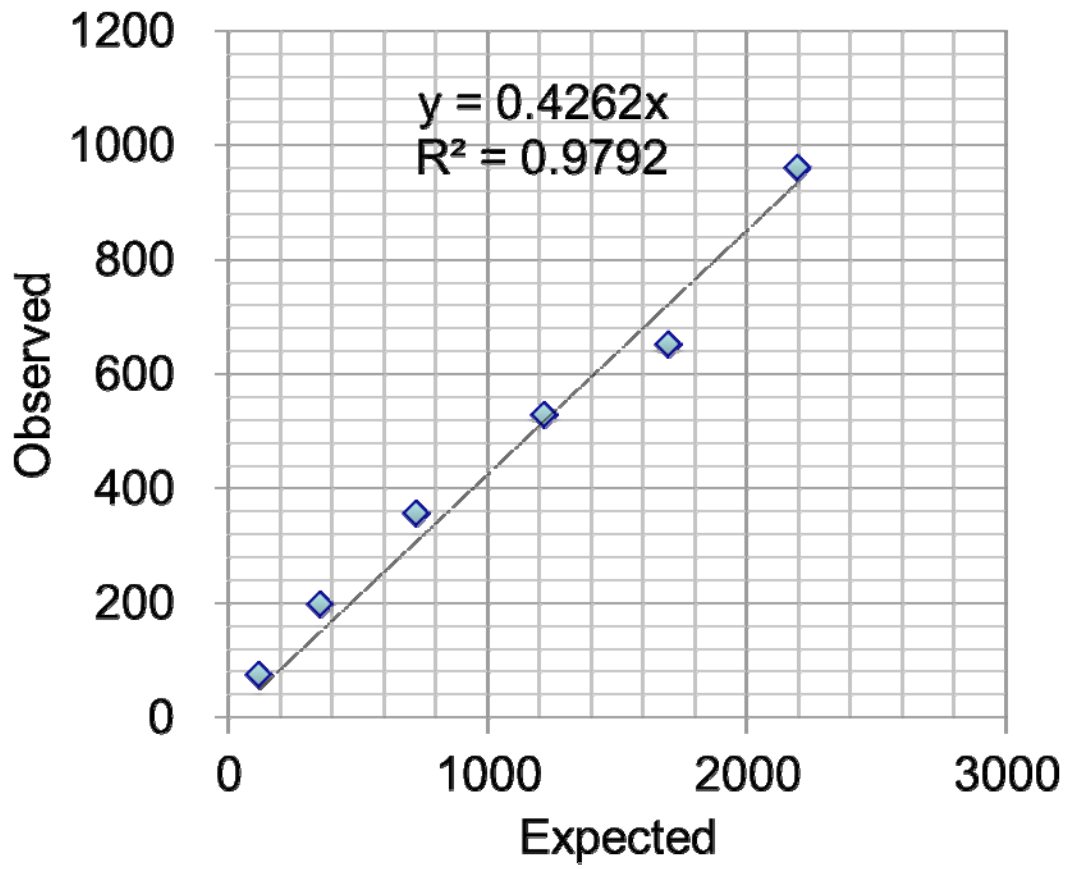

D

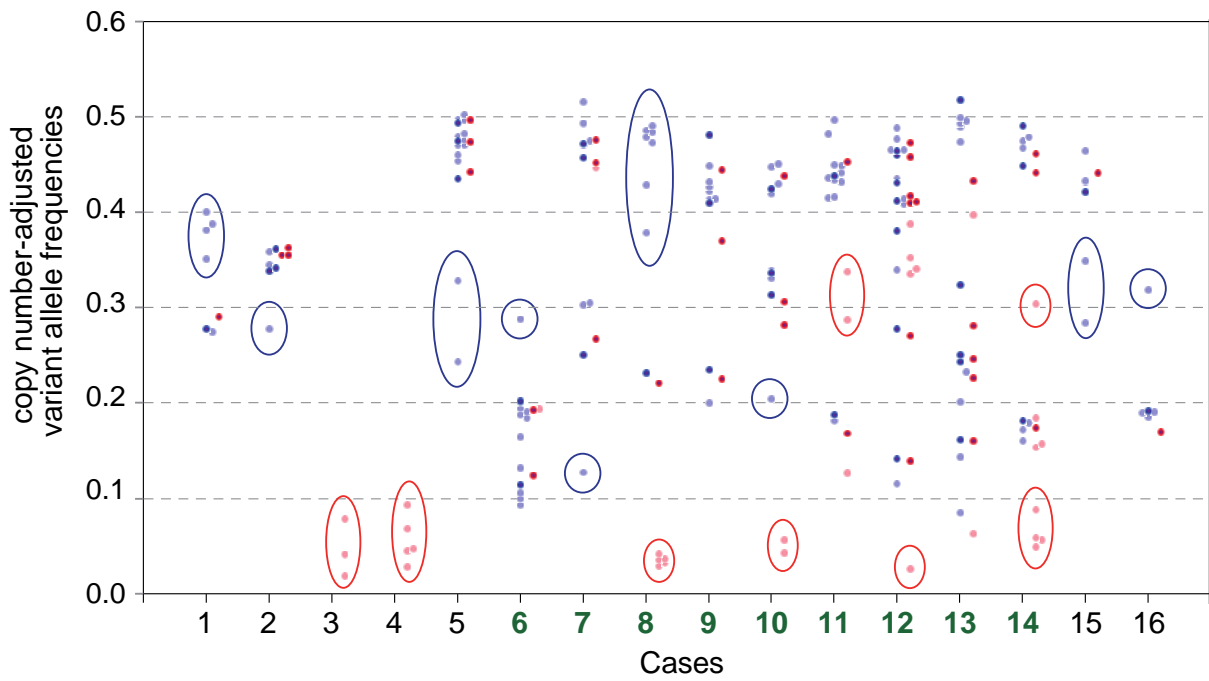

# Supplementary Figure S9

**A**

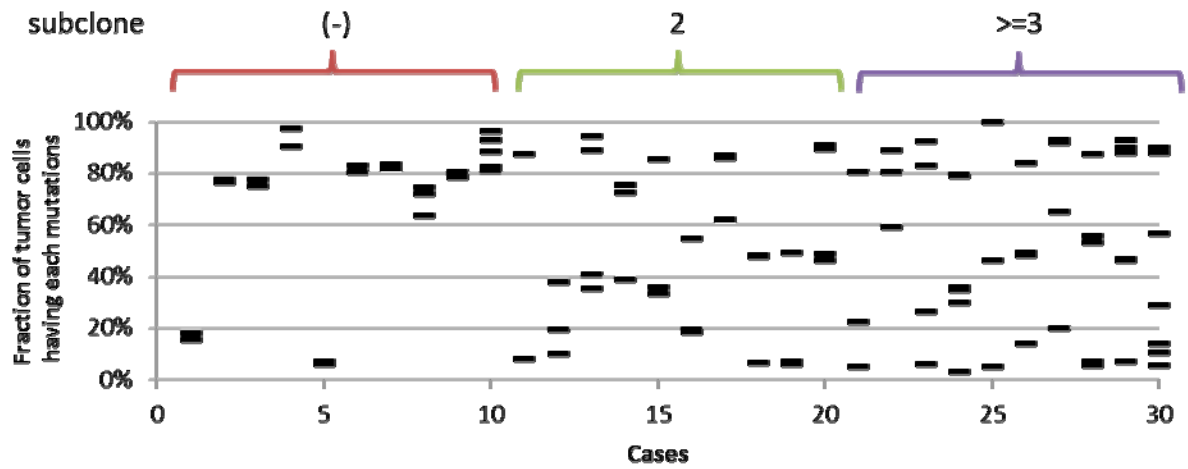

**B**

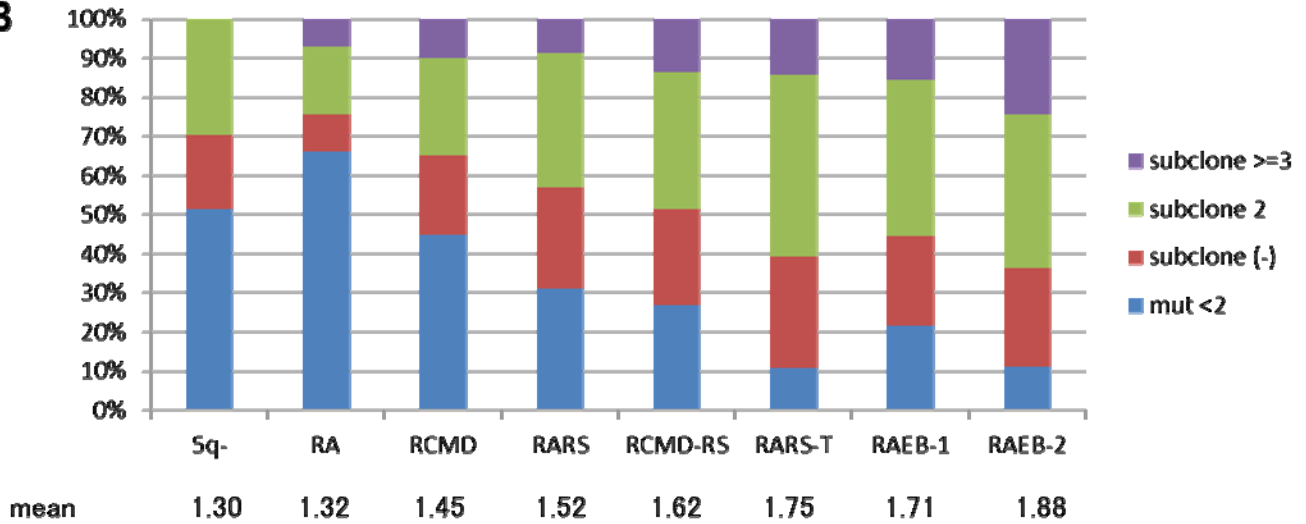

**C**

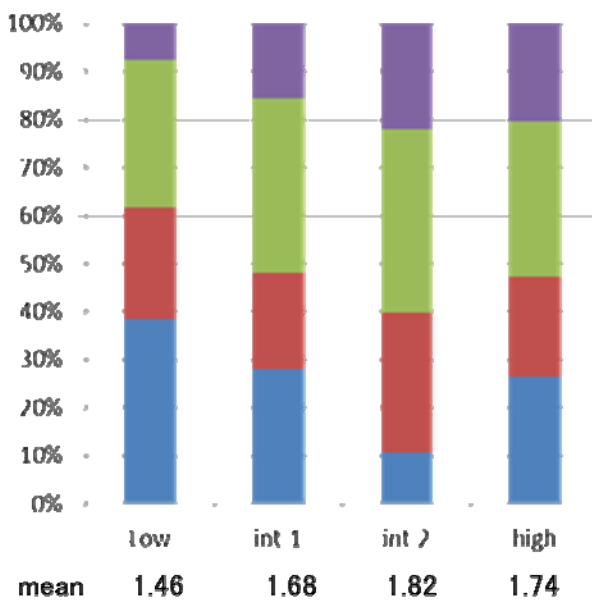

**D**

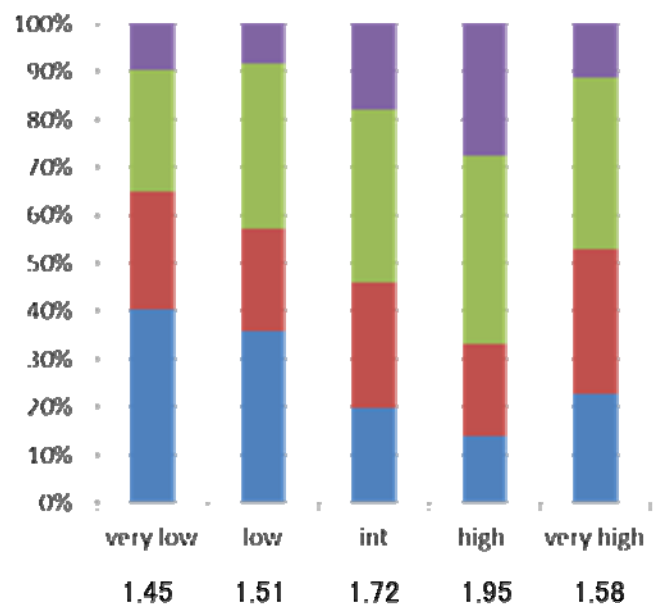

# Supplementary Figure S10

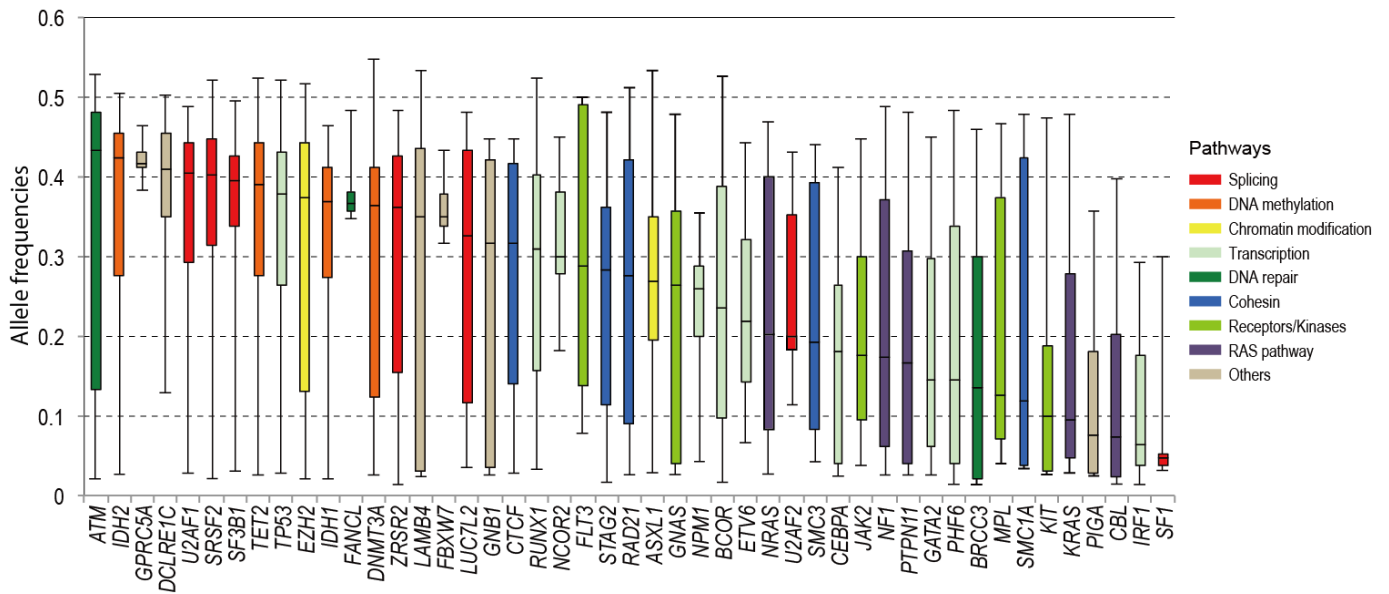

Supplementary Figure S11 A-F

**A**

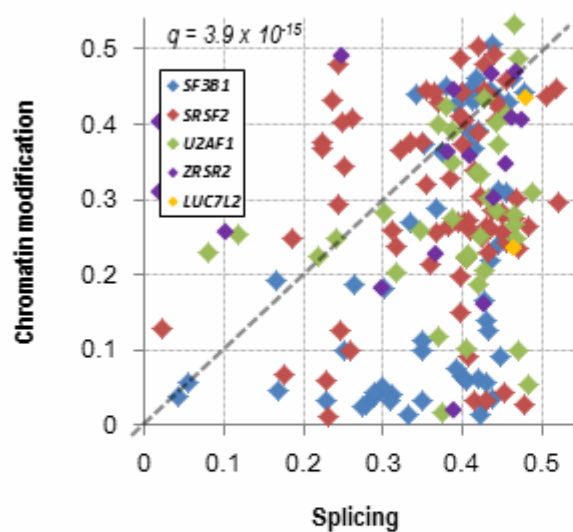

**D**

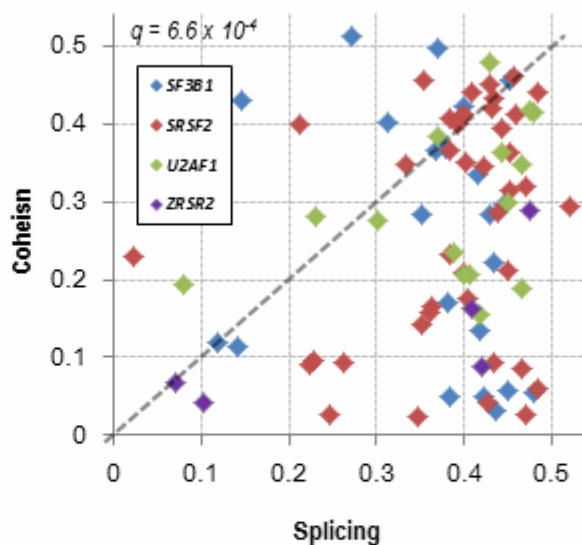

**B**

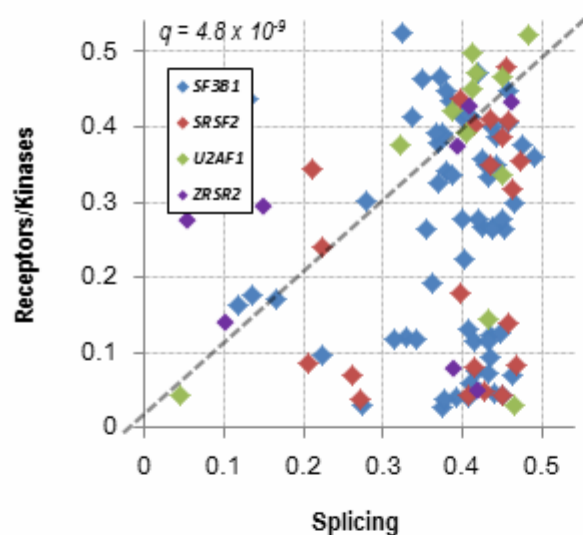

**E**

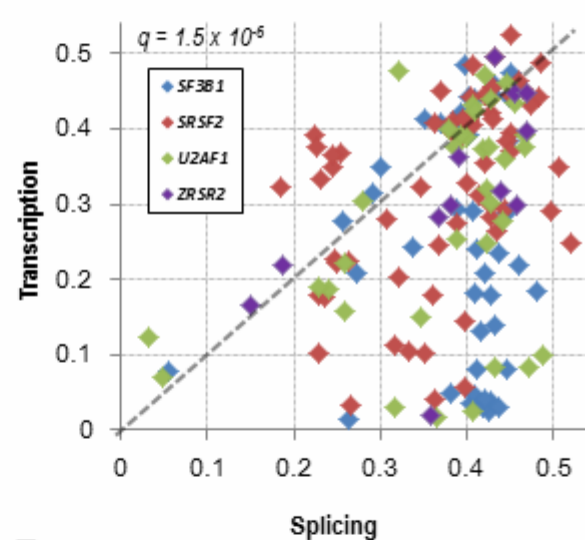

**C**

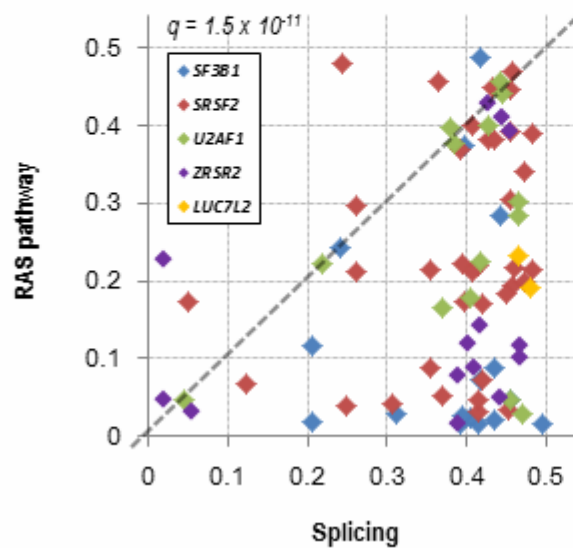

**F**

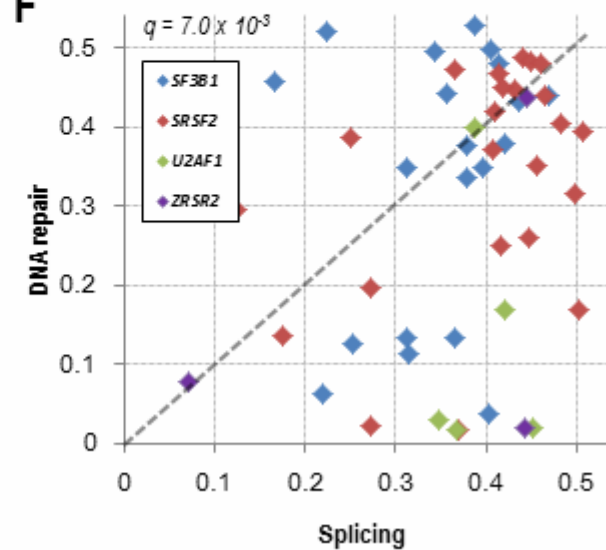

Supplementary Figure S11 G-L

**G**

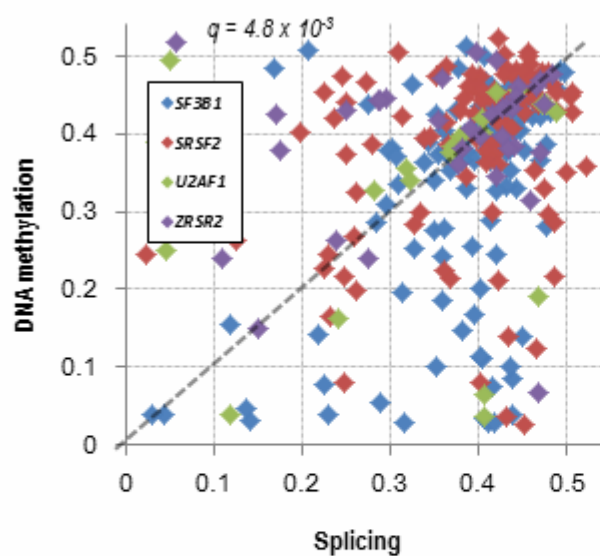

**J**

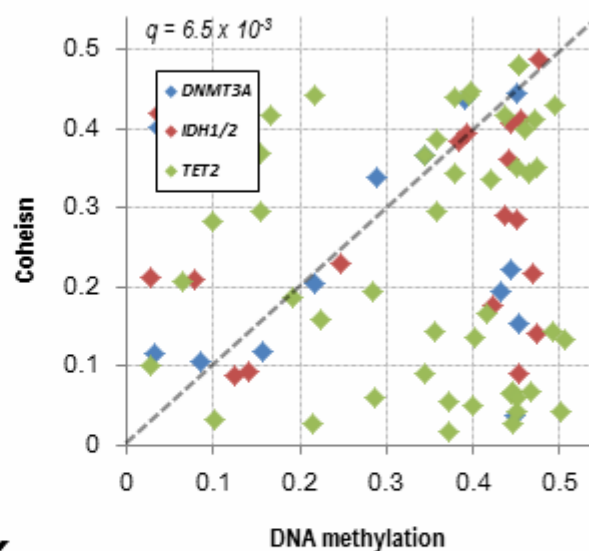

**H**

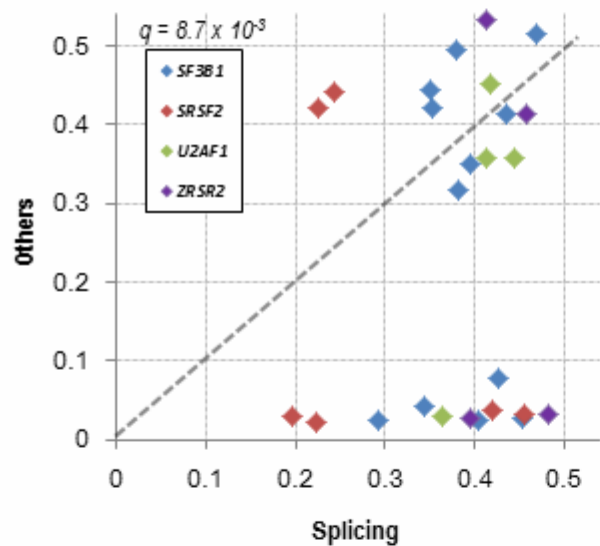

**K**

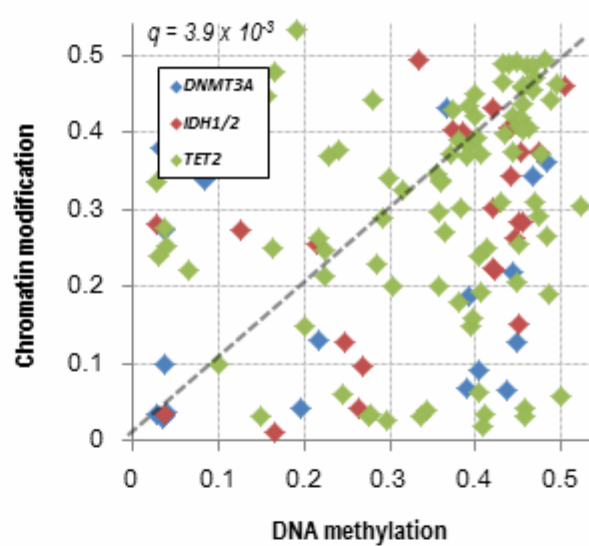

**I**

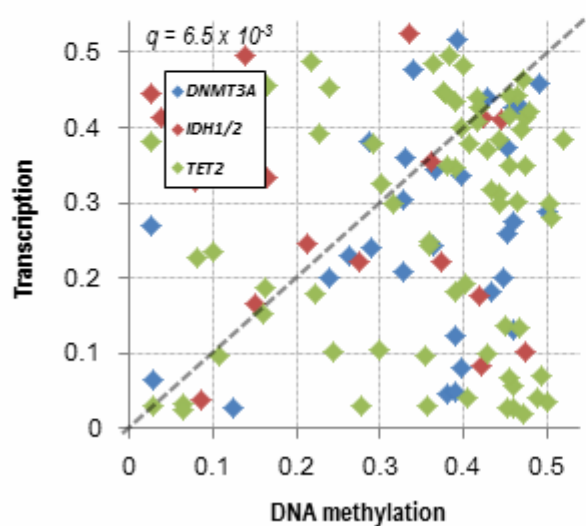

**L**

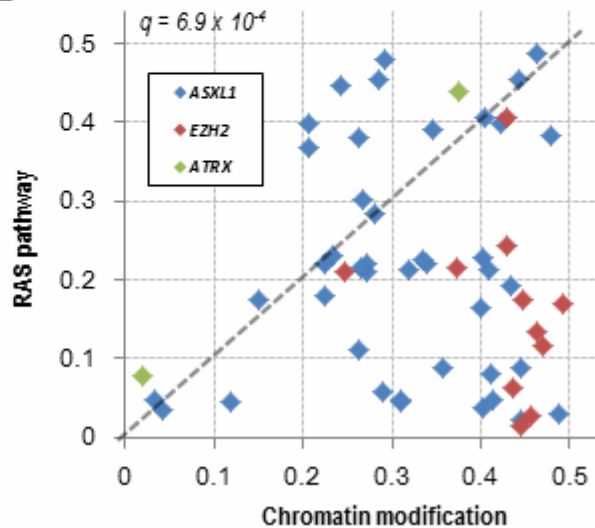

Supplementary Figure S11 M-R

M

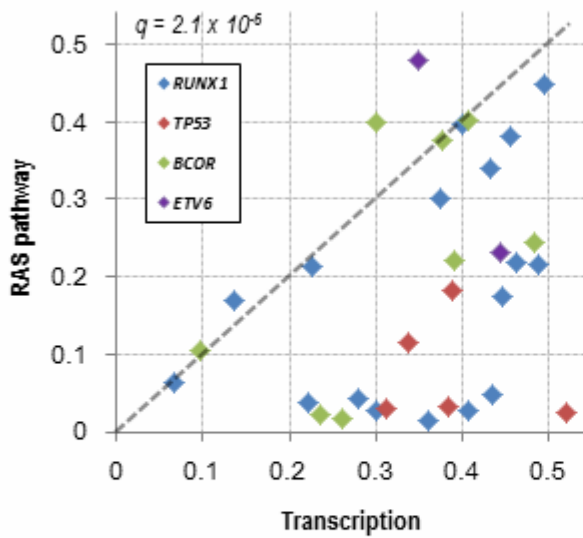

P

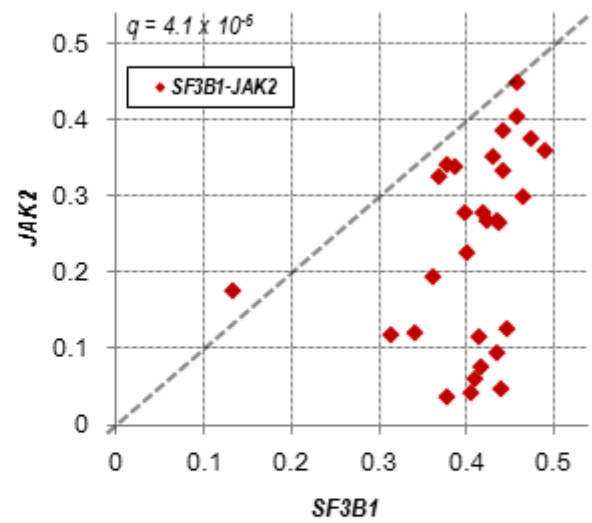

N

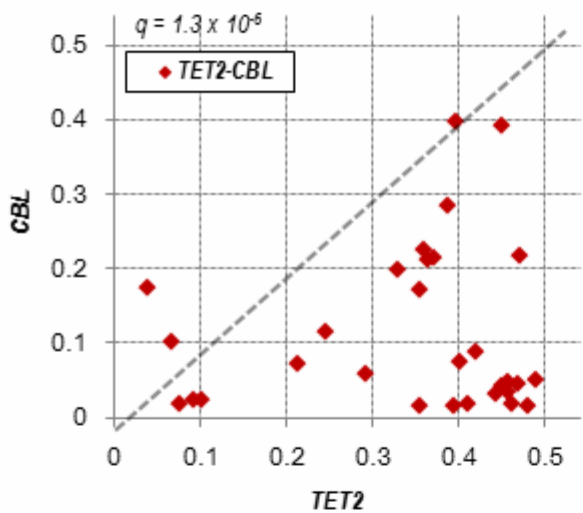

Q

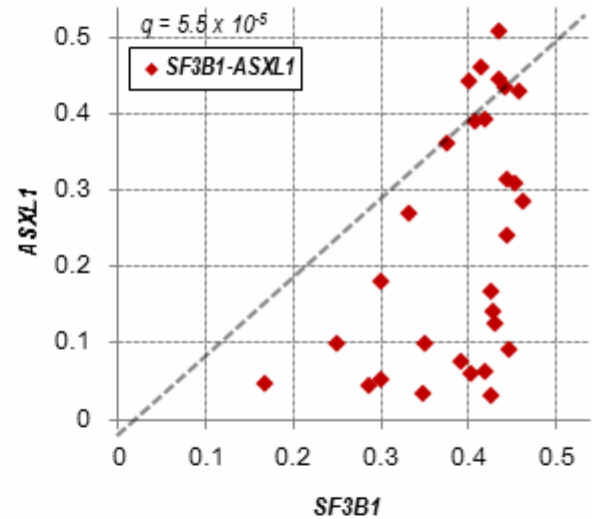

O

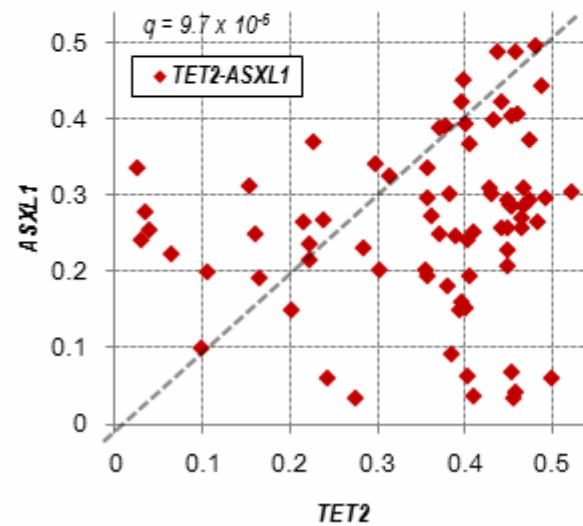

R

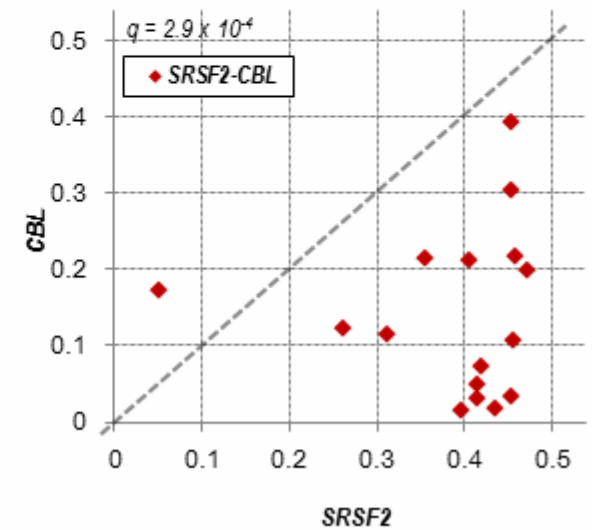

Supplementary Figure S11 S-X

S

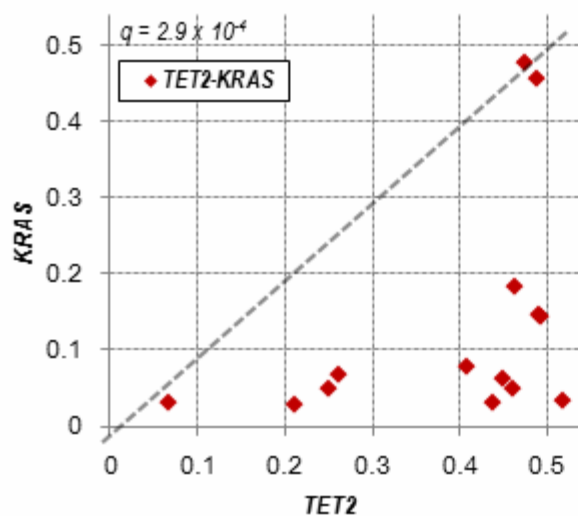

V

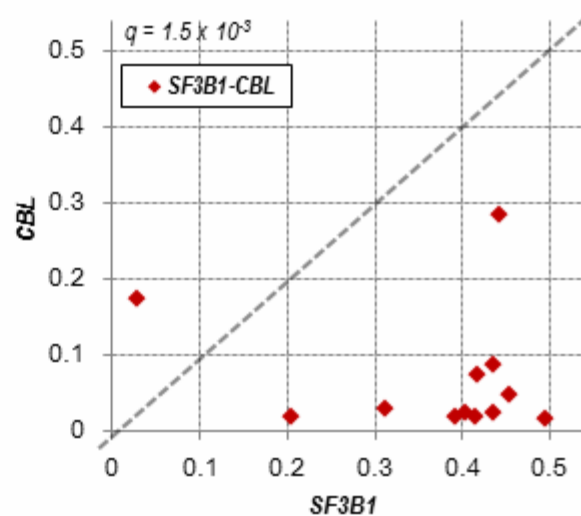

T

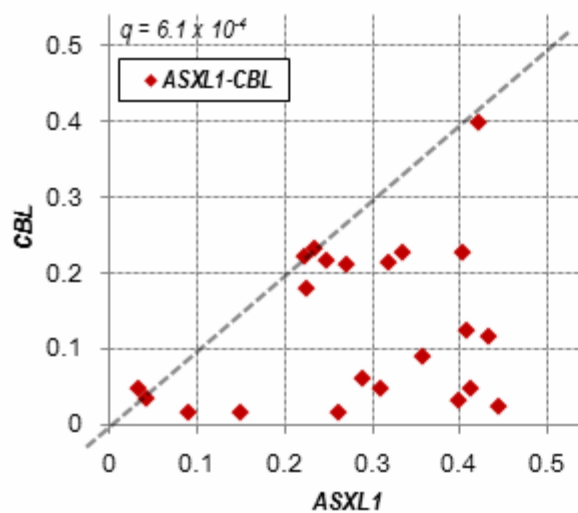

W

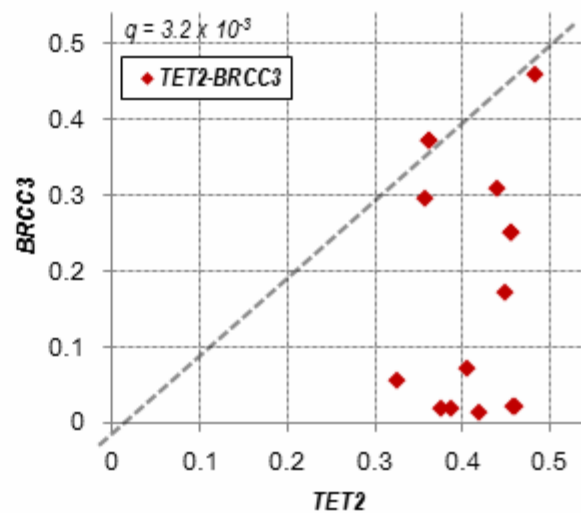

U

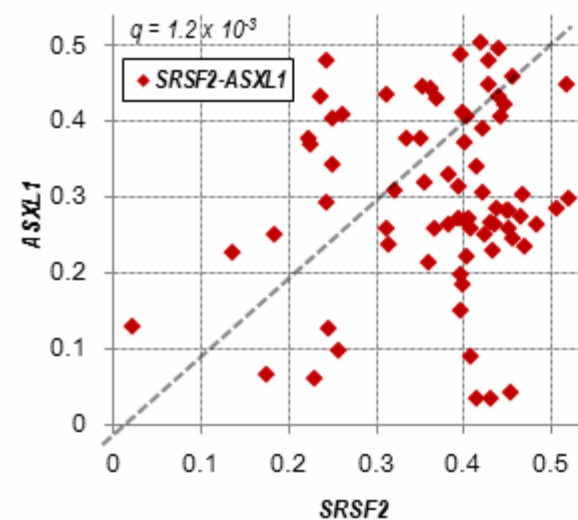

X

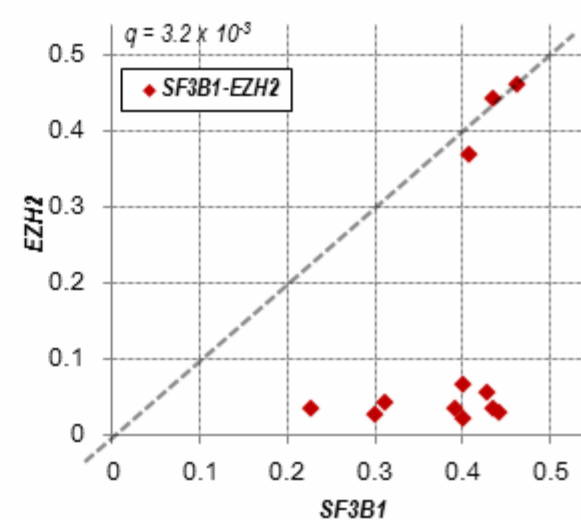

## Supplementary Figure S11 Y-Z

### Y

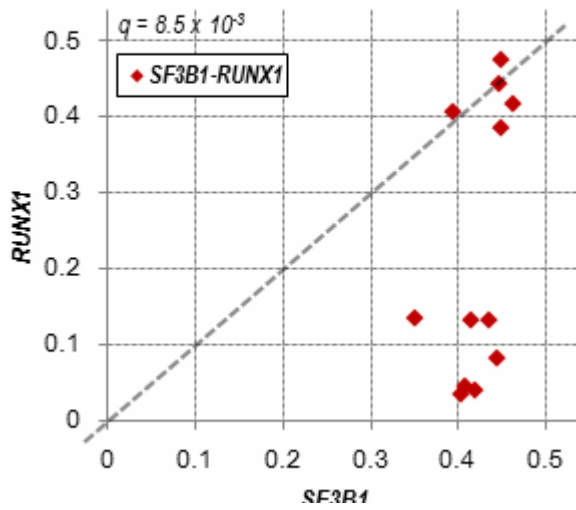

### Z

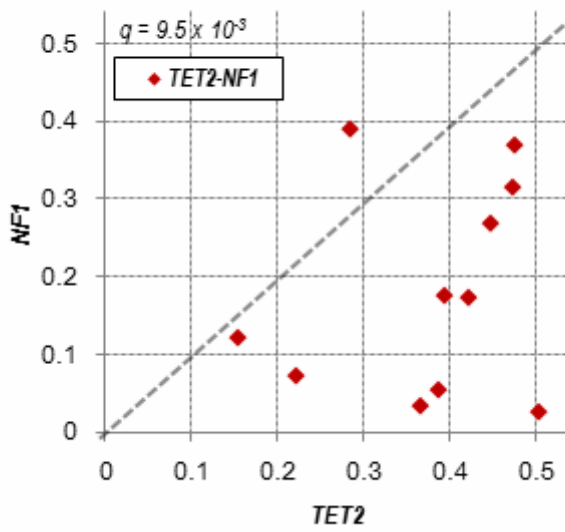



Supplementary Figure S12

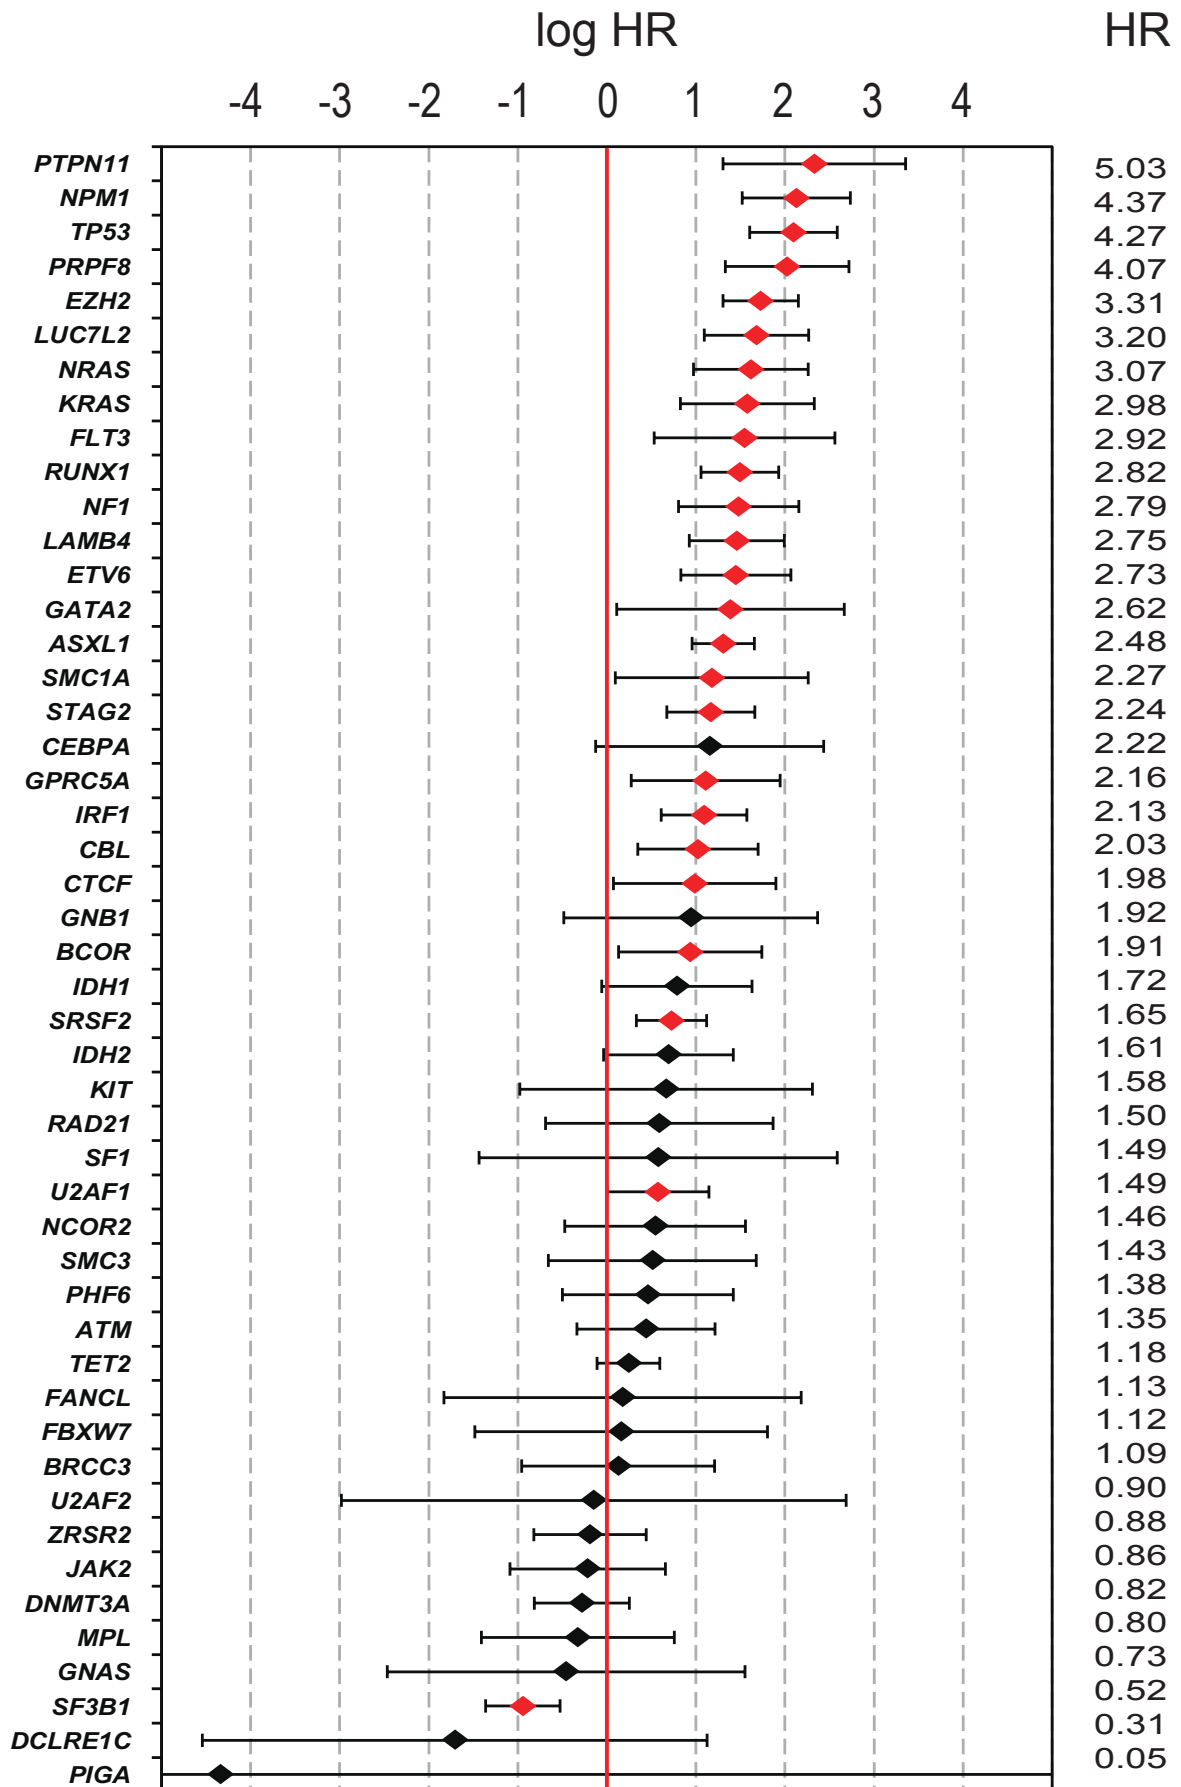

Supplementary Figure S13

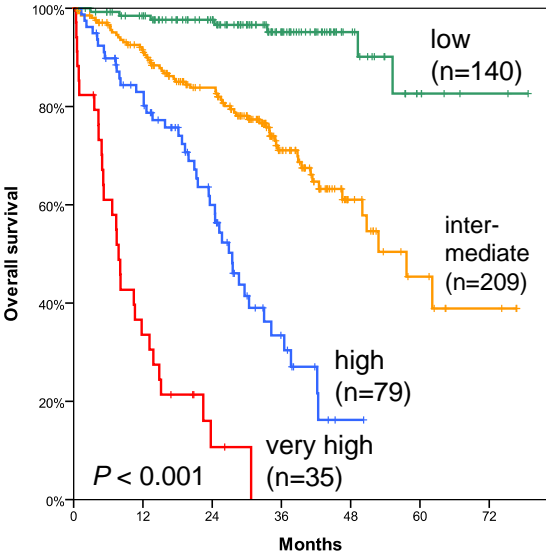

# Supplementary Figure S14

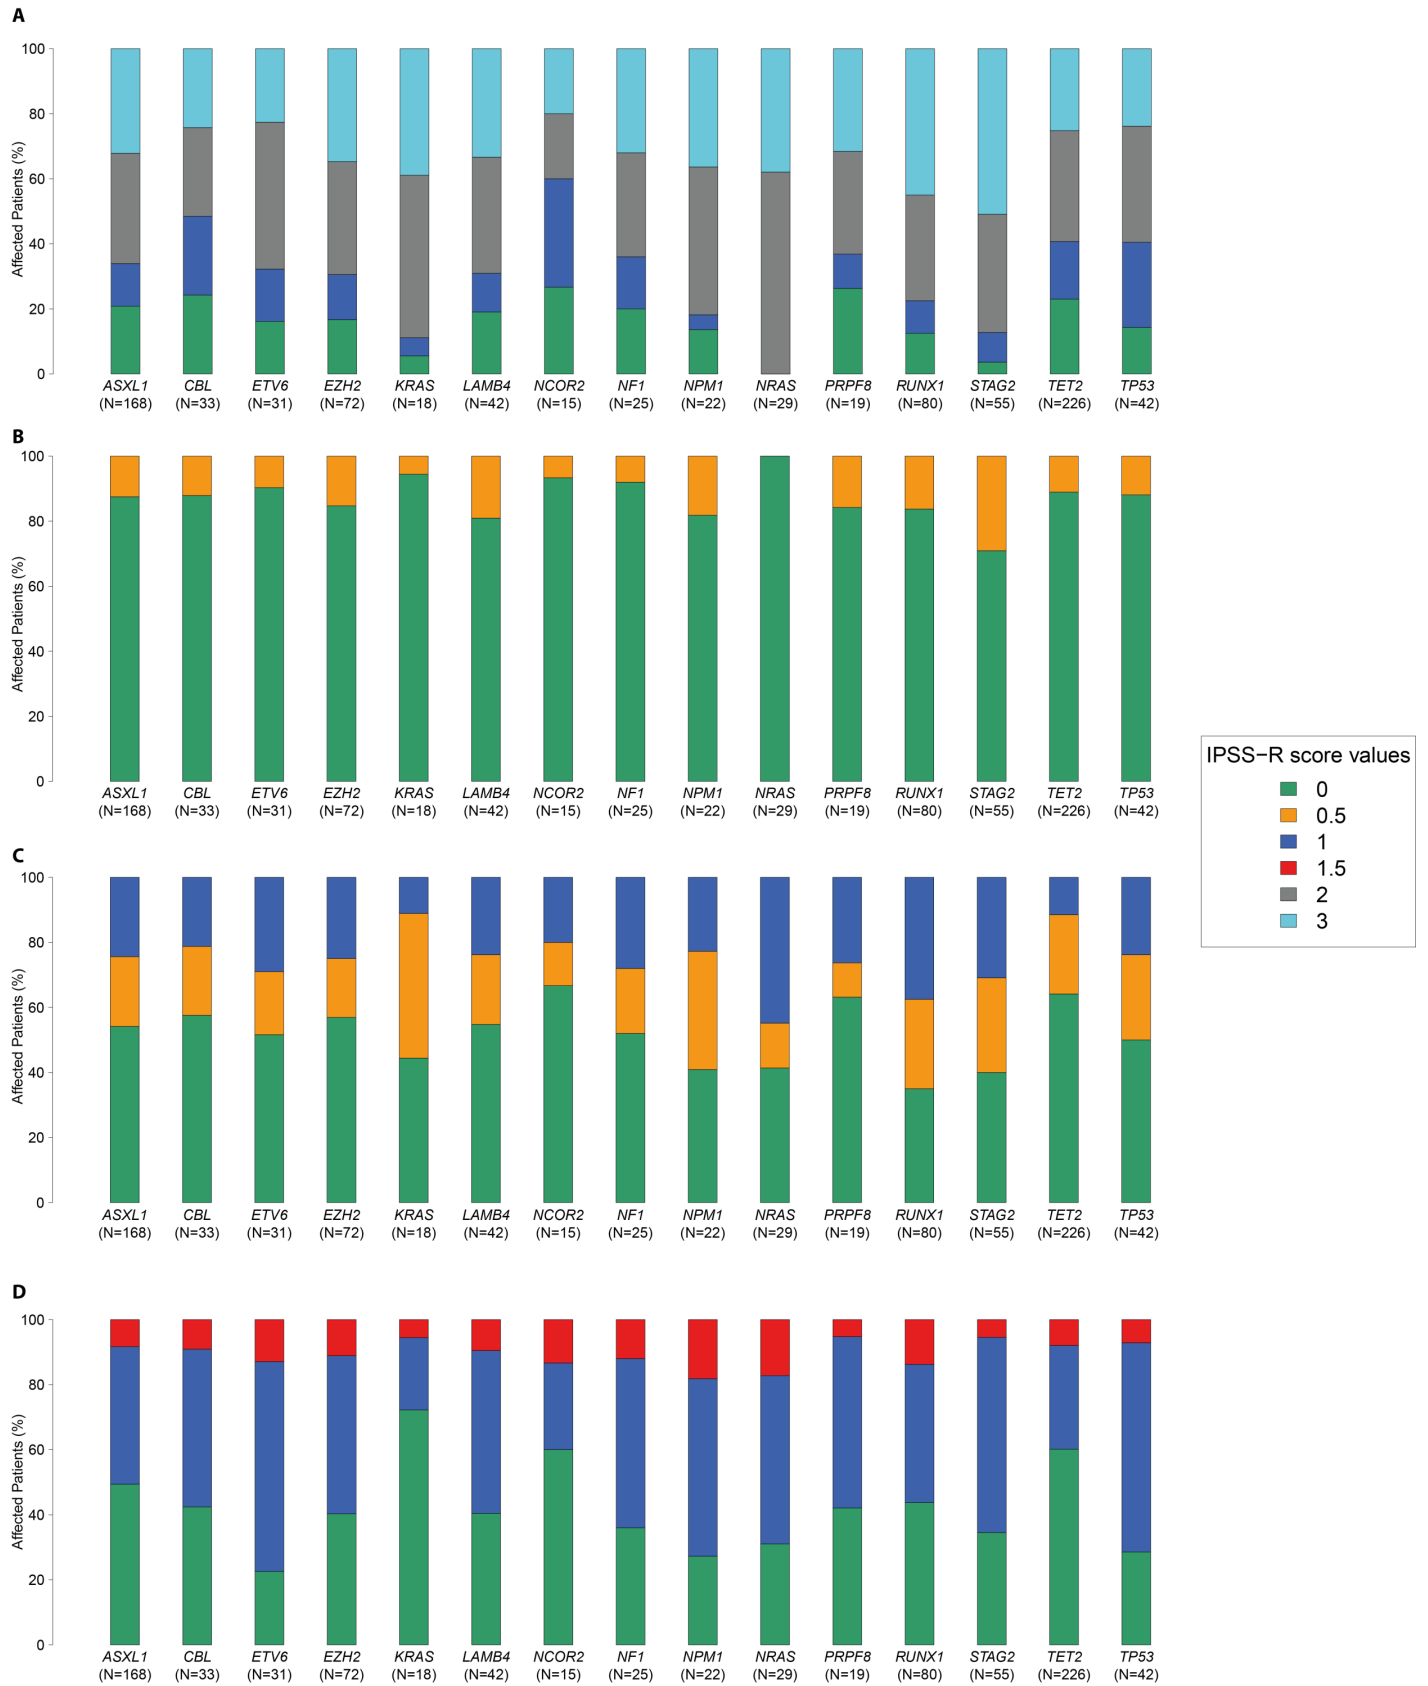

# Supplementary Figure S15

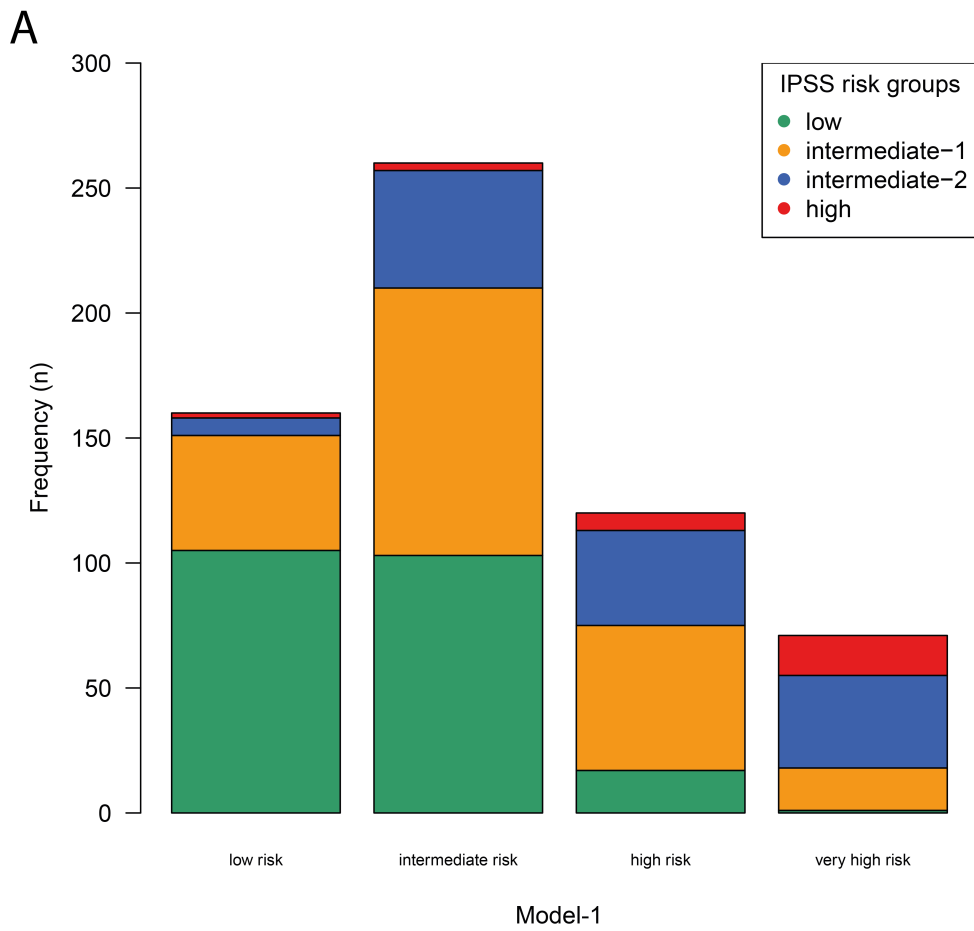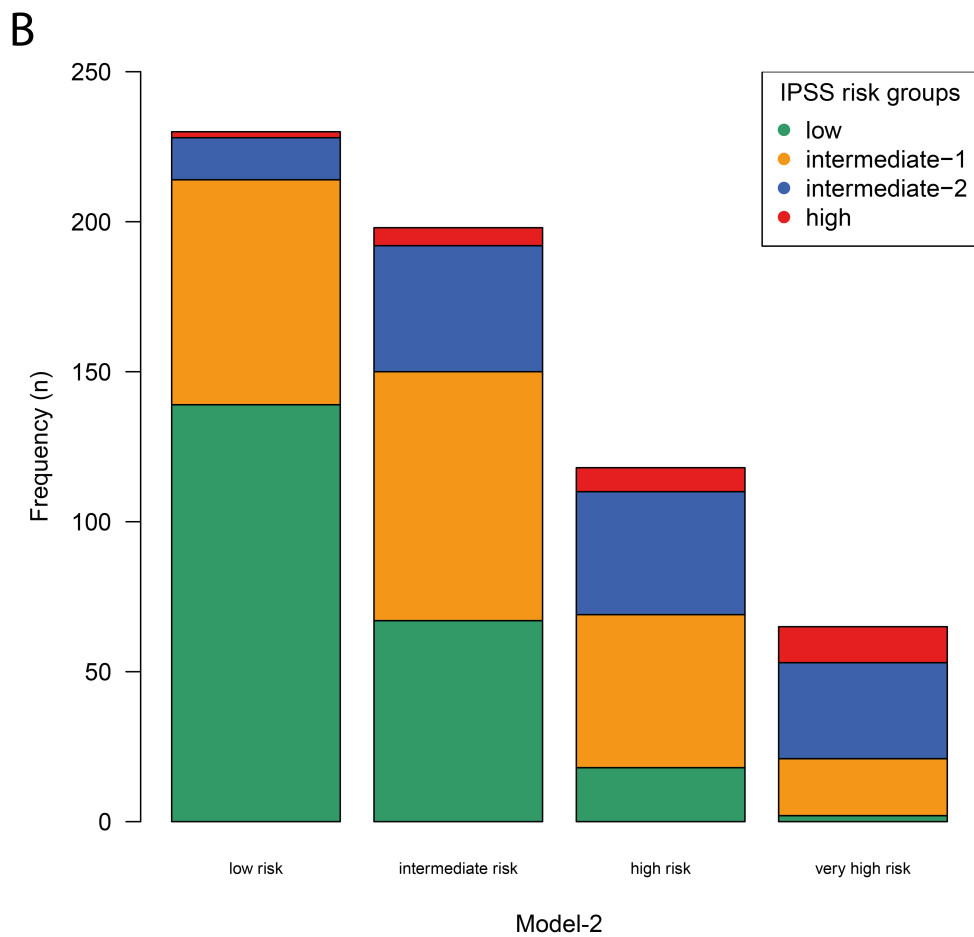

# Supplementary Figure S16

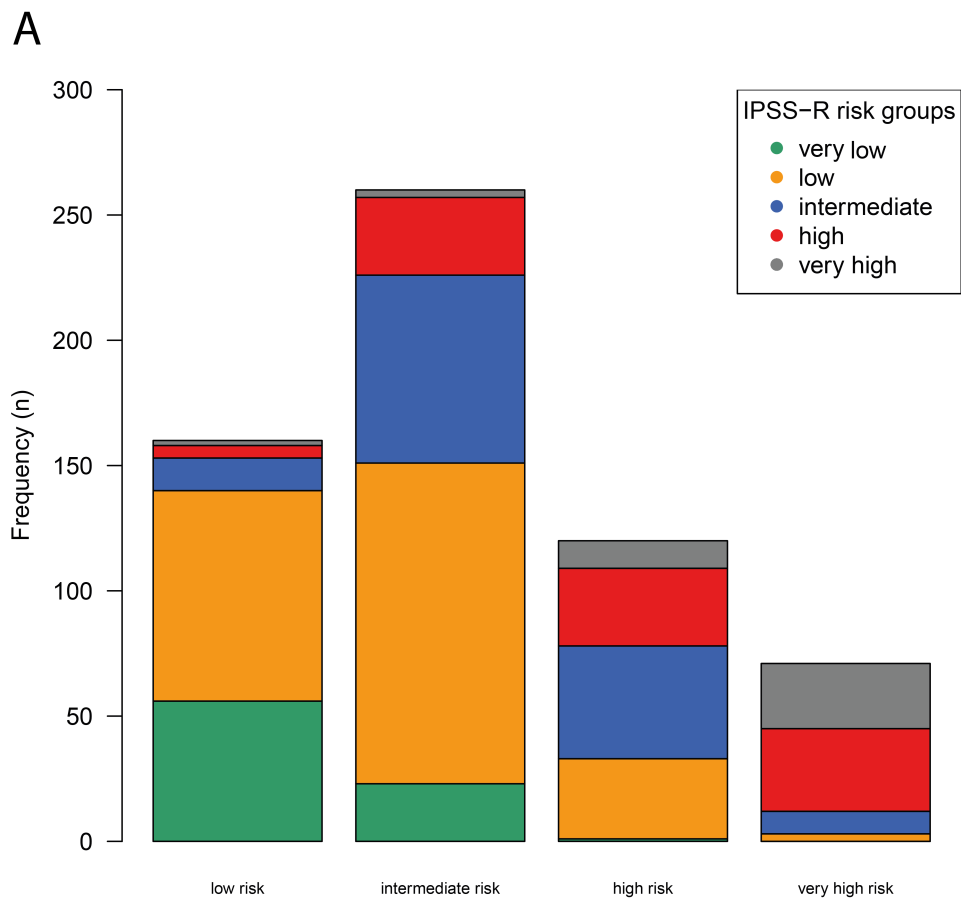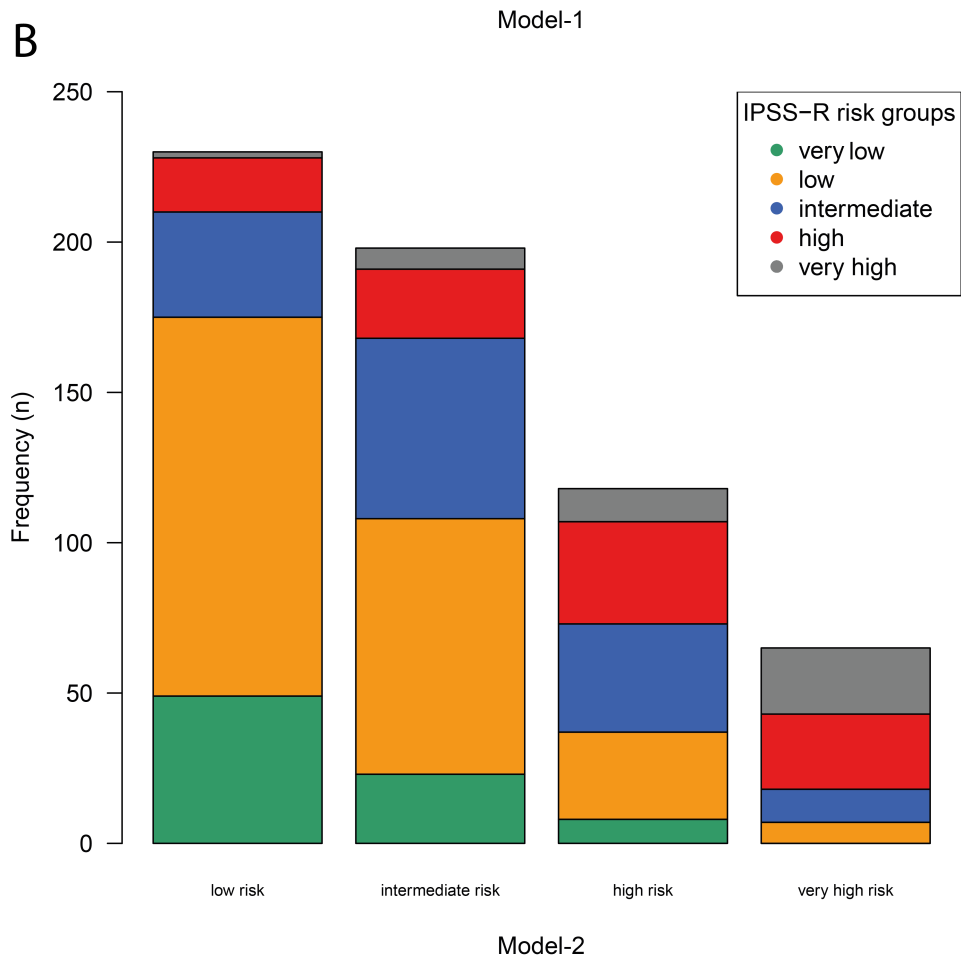

# Supplementary Figure S17

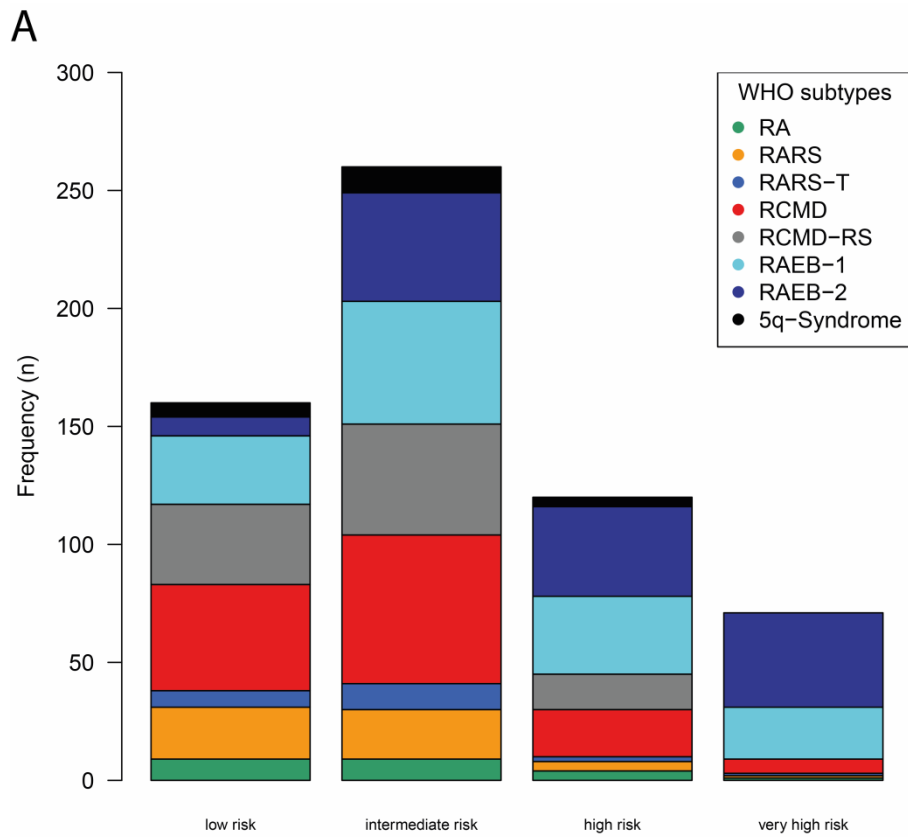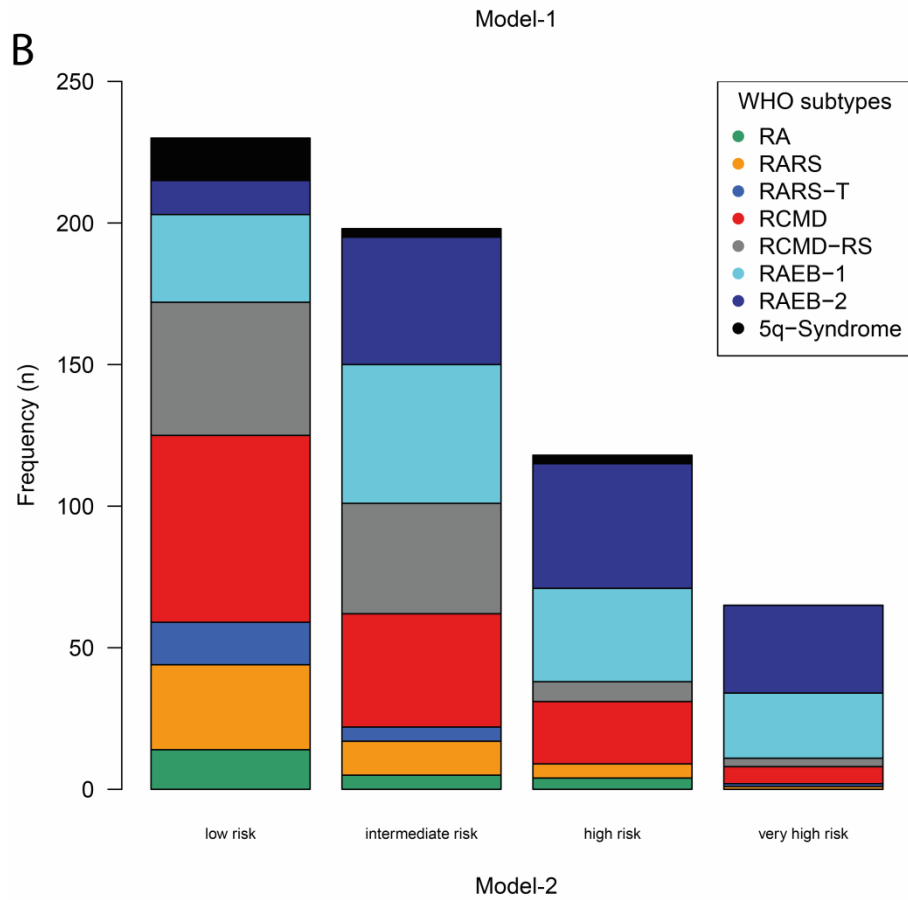

# Supplementary Figure S18

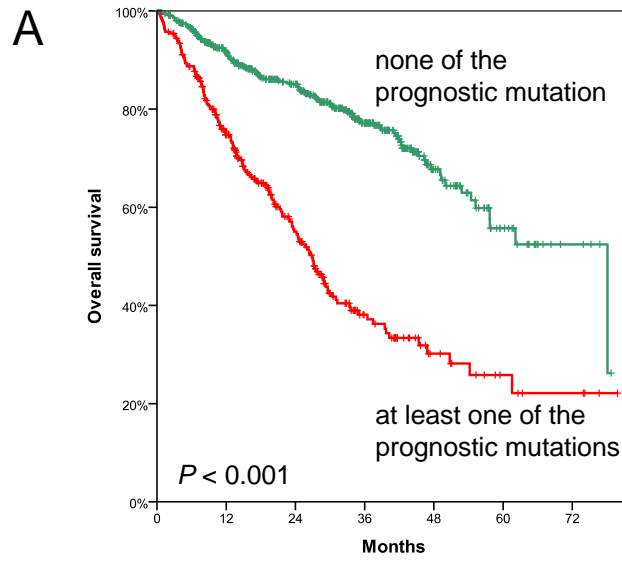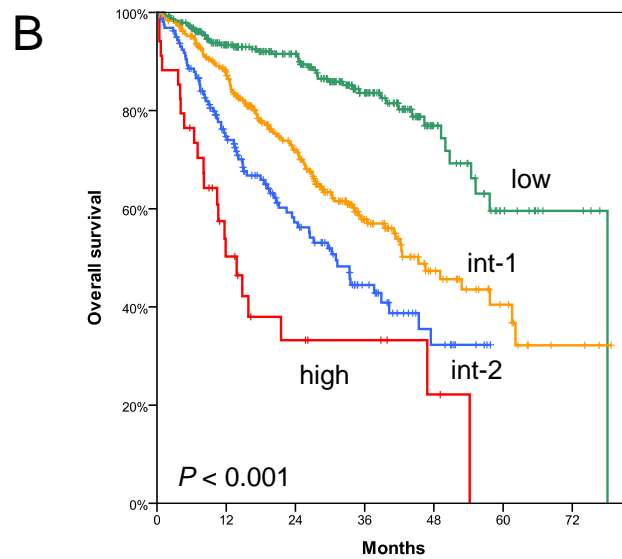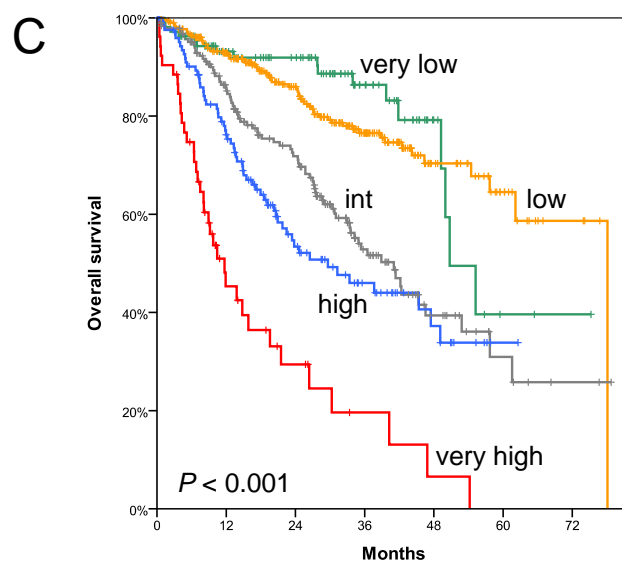

# Supplementary Figure S19

**A**

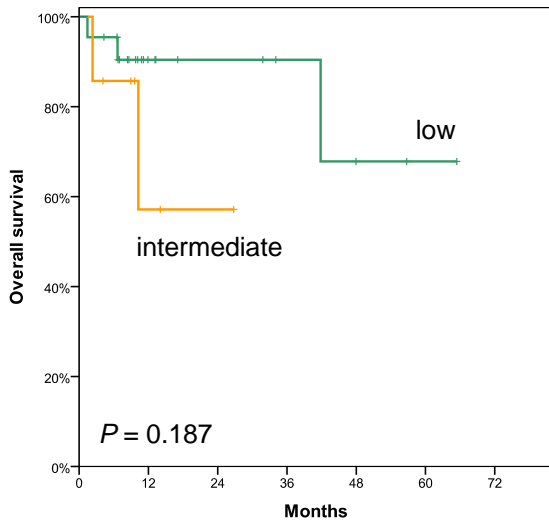

**B**

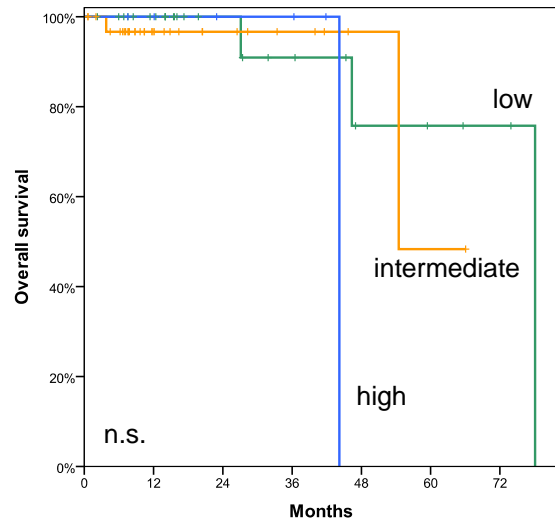

**C**

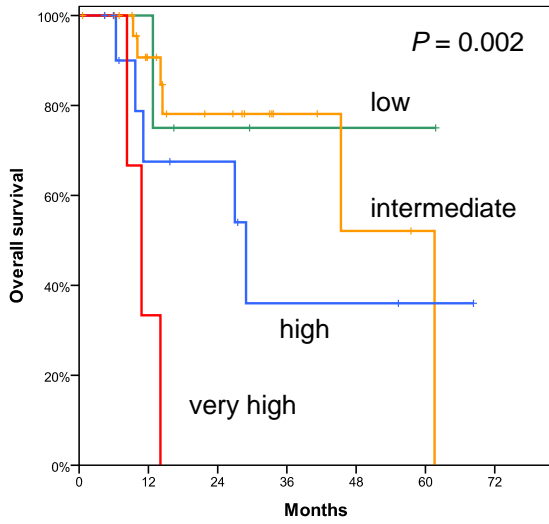

**D**

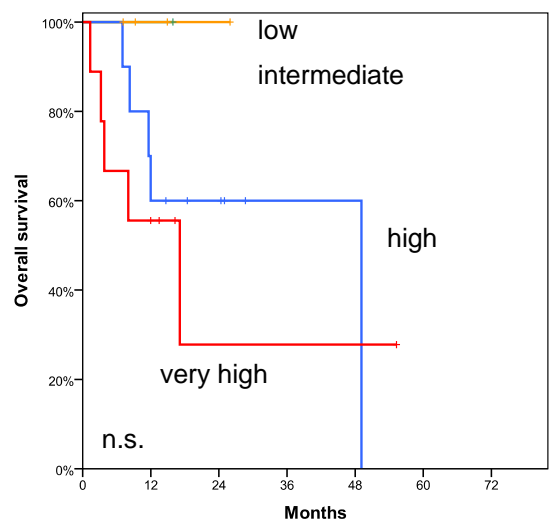

**E**

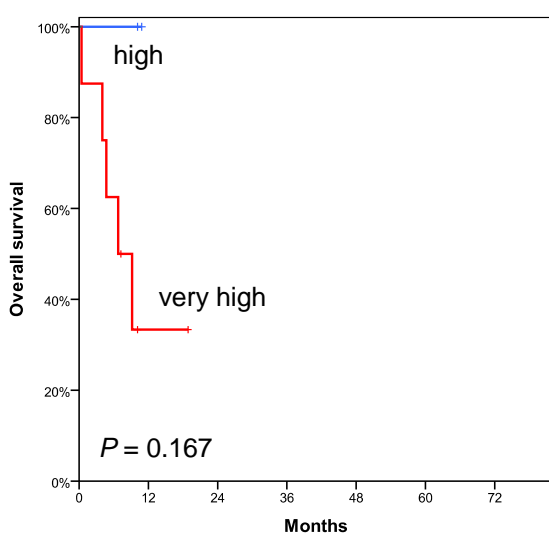



# Supplementary Figure S20

A

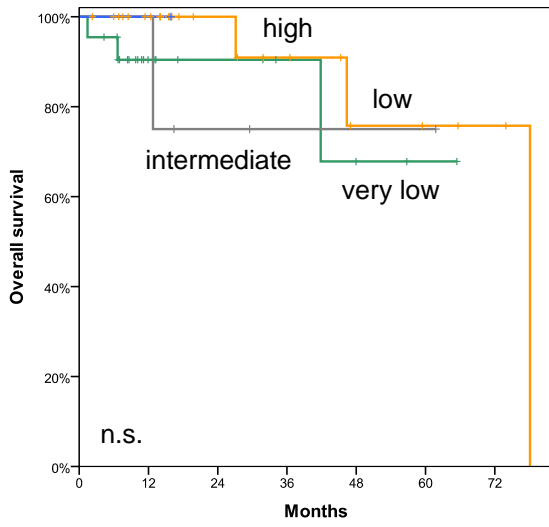

B

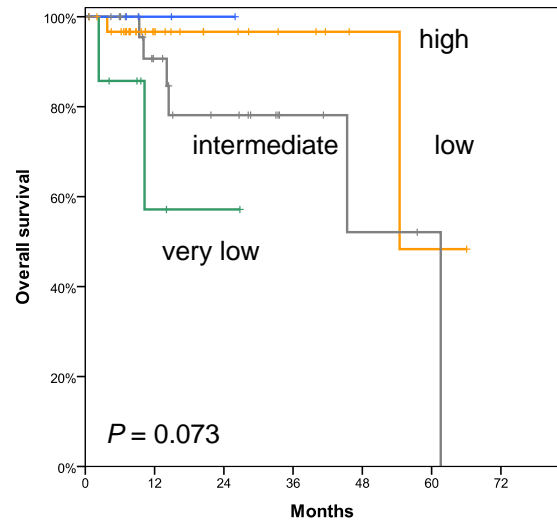

C

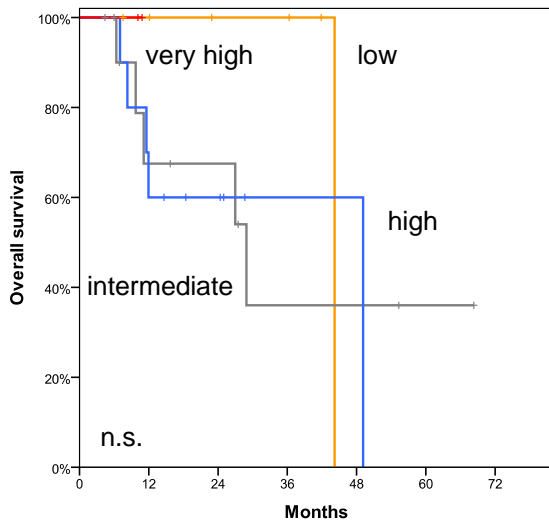

D

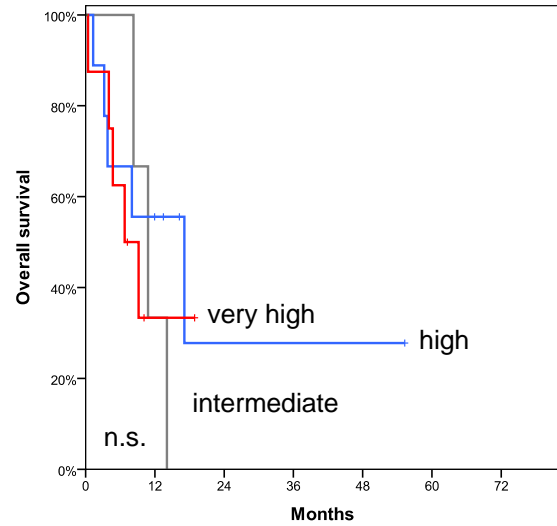

# Supplementary Figure S21

**A**

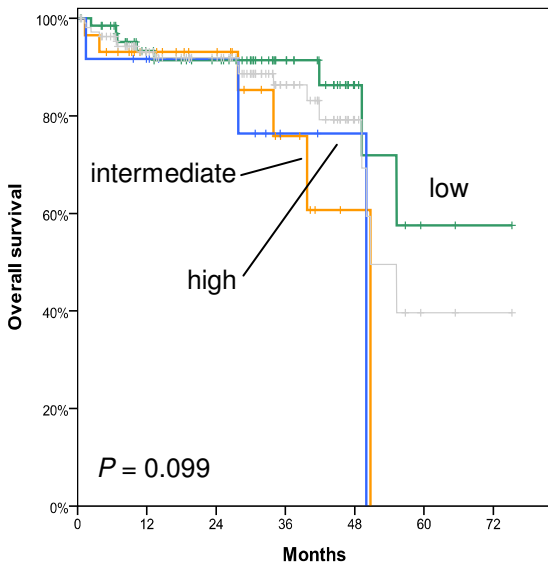

**B**

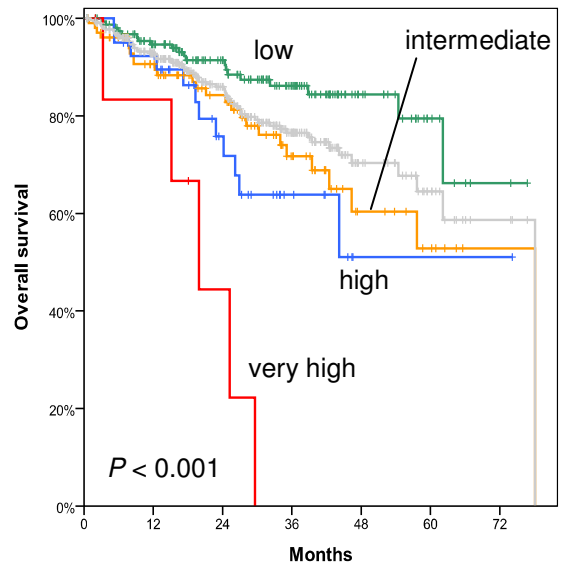

**C**

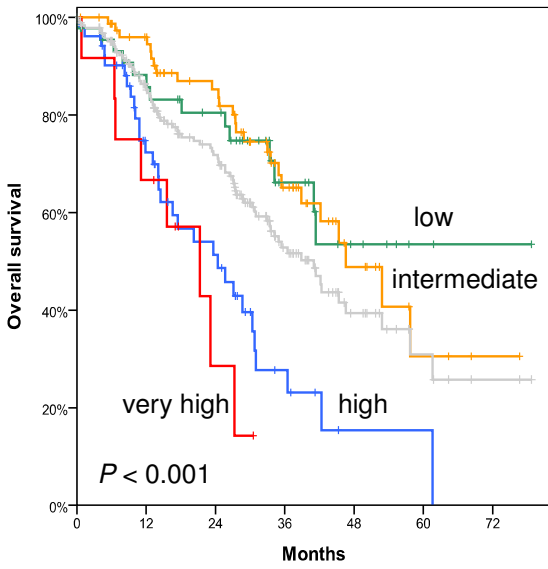

**D**

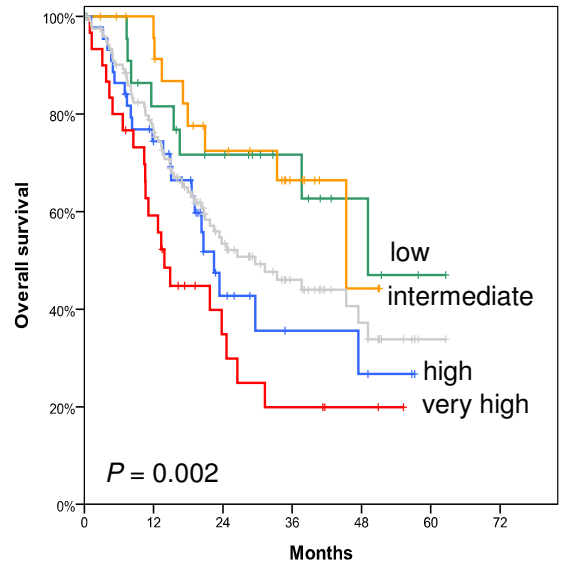

**E**

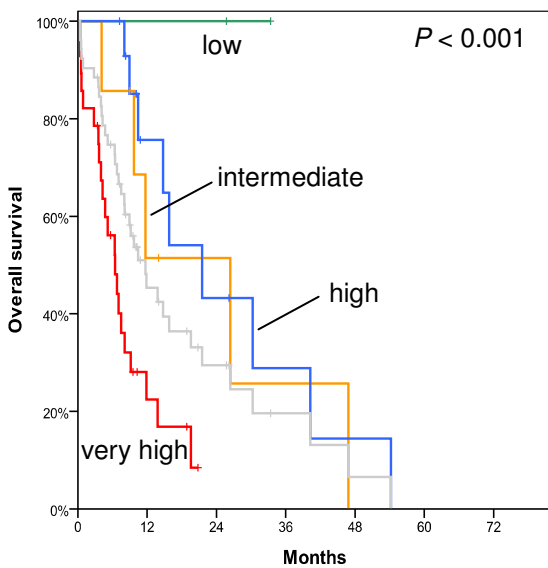

Supplementary Figure S22

A

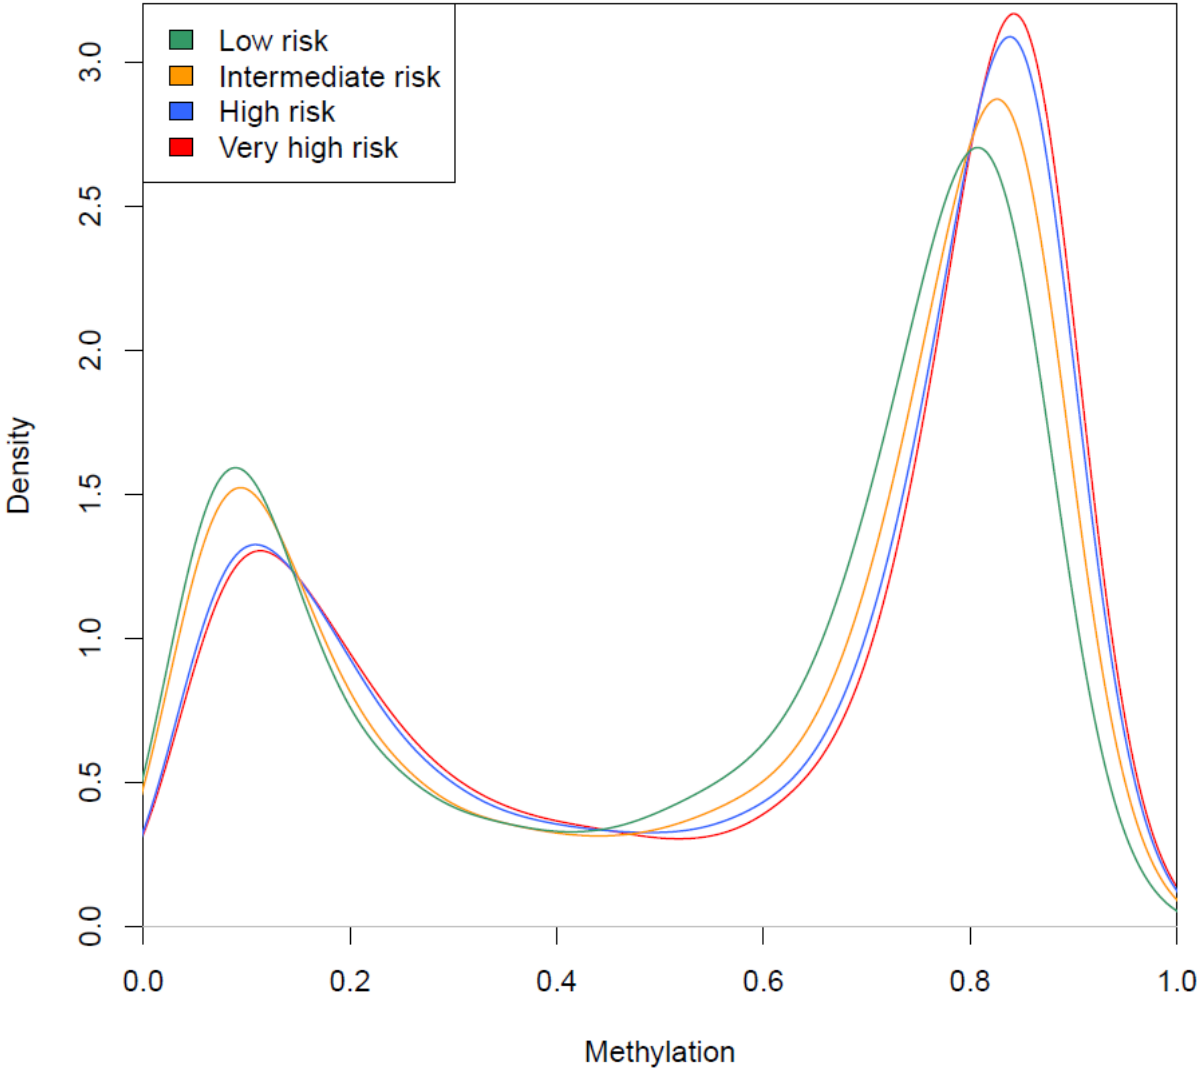

Supplementary Figure S22

B

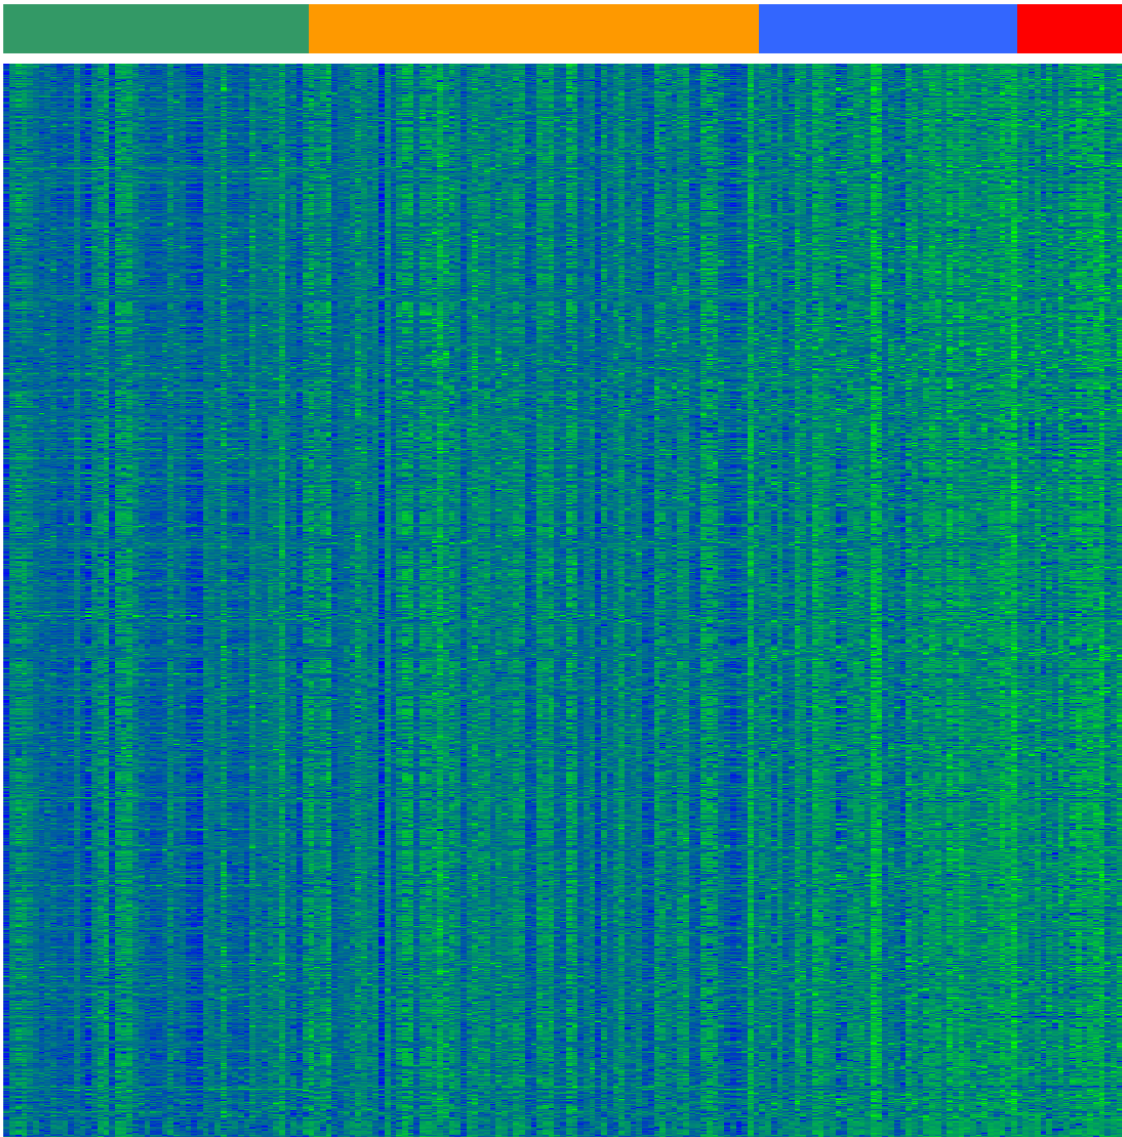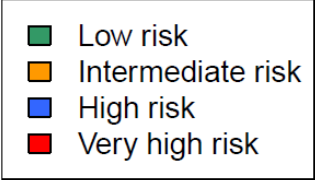

Supplement: leu2013336x1.pdf [file leu2013336x1.pdf]
